# Supplementary material for: Colour pattern predicts outcome of female contest competition in a sexually monomorphic fish
Source: Biol Lett. 2018 Nov 7;14(11):20180480. doi: 10.1098/rsbl.2018.0480 (PMC6283925; doi:10.1098/rsbl.2018.0480)
Supplement: Supplementary data 1 [file rsbl20180480supp2.xlsx]

## Sheet: pub_data
trial	sex	SL	bar.width	weight	RBD	CFD	RSD	outcome	duration
15	ff	8.7	2.9	25.3	0.059576	-0.00394478	0	W	25.961
15	ff	8.7	2.6	25.4	-0.059576	0.00394478	0	L	25.961
16	ff	8.7	3.1	26.4	0.109545	0.0493832	-0.00571429	W	292.873
16	ff	8.8	2.6	26	-0.109545	-0.0493832	0.00571429	L	292.873
17	ff	8.9	3.6	25.5	0.134187	-0.0684158	0.00564972	W	0
17	ff	8.8	2.8	26.4	-0.134187	0.0684158	-0.00564972	L	0
18	ff	9.1	3.2	30.4	0.0575792	0.0195522	-0.00546448	L	49.54
18	ff	9.2	2.9	30.8	-0.0575792	-0.0195522	0.00546448	W	49.54
19	ff	9.4	3.6	27.7	0.0498611	0.0108894	0	W	36.817
19	ff	9.4	3.2	27.4	-0.0498611	-0.0108894	0	L	36.817
20	ff	9.3	3.2	28.2	0.0178983	0.0295697	-0.015873	L	11.419
20	ff	9.6	3.2	30.1	-0.0178983	-0.0295697	0.015873	W	11.419
21	ff	9.5	3.8	29.2	0.0796897	-0.014317	0.00529101	W	51.488
21	ff	9.4	3.2	28.7	-0.0796897	0.014317	-0.00529101	L	51.488
22	ff	9.7	3.4	30.9	0.000565796	-0.0221739	-0.0152284	L	38.239
22	ff	10	3.5	34.6	-0.000565796	0.0221739	0.0152284	W	38.239
23	ff	8.9	2.7	21.9	-0.0721221	-0.0619667	0	L	0
23	ff	8.9	3.1	23.3	0.0721221	0.0619667	0	W	0
24	ff	8.5	2.9	22	0.00402212	0.0899954	-0.017341	W	85.574
24	ff	8.8	3	22.3	-0.00402212	-0.0899954	0.017341	L	85.574
25	ff	8.6	3.1	22.5	-0.0260597	0.0293285	0.00584795	L	114.784
25	ff	8.5	3.2	21.1	0.0260597	-0.0293285	-0.00584795	W	114.784
26	ff	8.5	3	22.1	-0.0476285	0.0485814	-0.00584795	L	0
26	ff	8.6	3.3	21.8	0.0476285	-0.0485814	0.00584795	W	0
27	ff	8.5	3.1	18	-0.0220026	0.0281709	0	W	122.684
27	ff	8.5	3.2	17.5	0.0220026	-0.0281709	0	L	122.684
28	ff	8.1	2.6	18.1	-0.0873855	0.0626986	0	W	59.654
28	ff	8.1	3.1	17	0.0873855	-0.0626986	0	L	59.654
29	ff	7.8	2.6	16.7	-0.0408073	0.0345146	-0.0126582	L	57.388
29	ff	8	2.9	17.4	0.0408073	-0.0345146	0.0126582	W	57.388
30	ff	7.8	2.3	15.8	-0.0600612	-0.0757893	0.00645161	L	55.377
30	ff	7.7	2.6	16.4	0.0600612	0.0757893	-0.00645161	W	55.377
31	ff	7.5	2.2	15.3	-0.128357	0.0660299	-0.00662252	L	926.929
31	ff	7.6	2.8	14.9	0.128357	-0.0660299	0.00662252	W	926.929
32	ff	7.3	2.1	14.7	-0.123447	0.0739034	-0.0135135	L	6.495
32	ff	7.5	2.7	14.8	0.123447	-0.0739034	0.0135135	W	6.495
1	mm	9.5	3.6	24.6	0.126822	-0.047628	0	L	37.043
1	mm	9.5	2.8	25.8	-0.126822	0.047628	0	W	37.043
2	mm	9.5	3.3	28.1	0.0519358	0.142035	-0.0104167	W	39.442
2	mm	9.7	3	25.6	-0.0519358	-0.142035	0.0104167	L	39.442
3	mm	9.6	3.5	28.8	0.063434	0.0498324	0	W	68.01
3	mm	9.6	3.1	27.4	-0.063434	-0.0498324	0	L	68.01
4	mm	9.5	3.5	28.3	0.0576621	0.0418152	-0.0104167	L	59.953
4	mm	9.7	3.2	28.5	-0.0576621	-0.0418152	0.0104167	W	59.953
5	mm	9.6	3.5	27	0.0750778	0.00959536	-0.00518135	W	34.011
5	mm	9.7	3	27.4	-0.0750778	-0.00959536	0.00518135	L	34.011
6	mm	9.8	3.4	29.3	0.0314658	0.0743705	0	L	61.192
6	mm	9.8	3.2	27.2	-0.0314658	-0.0743705	0	W	61.192
7	mm	10	3.4	31.6	0.0413564	-0.0320645	-0.00497512	L	262.098
7	mm	10.1	3.1	33.4	-0.0413564	0.0320645	0.00497512	W	262.098
8	mm	10.4	3.4	31.1	0.0478869	-0.123624	0.0196078	L	116.557
8	mm	10	3	32.1	-0.0478869	0.123624	-0.0196078	W	116.557
33	mm	8	2.5	19	-0.0816555	-0.00524936	0	W	50.403
33	mm	8	2.9	19.1	0.0816555	0.00524936	0	L	50.403
34	mm	8.1	2.6	19	-0.00370256	-0.0023163	-0.00613497	L	20.312
34	mm	8.2	2.7	19.6	0.00370256	0.0023163	0.00613497	W	20.312
35	mm	8.5	2.8	20.7	-0.0451392	-0.119984	0.00591716	W	16.305
35	mm	8.4	3	22.7	0.0451392	0.119984	-0.00591716	L	16.305
36	mm	9.7	3.1	29.6	-0.0834075	-0.00673403	0	L	54.485
36	mm	9.7	3.7	29.8	0.0834075	0.00673403	0	W	54.485
38	mm	9	3.1	23.3	0.00366628	-0.0108481	-0.010989	L	27.735
38	mm	9.2	3.1	24.8	-0.00366628	0.0108481	0.010989	W	27.735
39	mm	9.3	3.1	21.7	0.0102619	-0.208419	0.0108696	W	48.357
39	mm	9.1	3	25.4	-0.0102619	0.208419	-0.0108696	L	48.357
40	mm	9.1	2.9	22	-0.0134866	-0.0871374	-0.0162162	L	758.827
40	mm	9.4	3.1	25.9	0.0134866	0.0871374	0.0162162	W	758.827
41	mm	8.8	2.5	22	-0.0535405	-0.0630603	-0.011236	L	60.256
41	mm	9	2.9	24.7	0.0535405	0.0630603	0.011236	W	60.256
42	mm	8.2	2.6	15.3	-0.120667	-0.187201	0.0649351	W	50.537
42	mm	7.2	2.9	13.6	0.120667	0.187201	-0.0649351	L	50.537
