# Supplementary material for: Colour pattern predicts outcome of female contest competition in a sexually monomorphic fish
Source: Biol Lett. 2018 Nov 7;14(11):20180480. doi: 10.1098/rsbl.2018.0480 (PMC6283925; doi:10.1098/rsbl.2018.0480)
Supplement: Supplementary data 2 [file rsbl20180480supp3.xlsx]

## Sheet: Biol.Lett.permuted.models
ff.intercept	ff.intercept.p	ff.stripe	ff.stripe.p	ff.size	ff.size.p	ff.cond	ff.cond.p	aic.ff.stripe	aic.ff.size	aic.ff.cond
0.284976	0.706674	30.4075	0.046388	199.257	0.109606	41.6215	0.114217	6.23124	1.77228	1.45123
1.00574	0.358675	41.876	0.118912	257.506	0.0796515	54.6397	0.102788	6.79571	3.56328	2.95967
-0.610178	0.437809	30.9088	0.0339039	189.764	0.158779	39.2946	0.128317	6.72627	0.720226	1.34129
-0.105986	0.887325	28.9078	0.0420923	212.57	0.102603	42.9979	0.0945251	6.28388	2.44711	2.28712
-0.837357	0.364478	37.2425	0.0696455	222.533	0.0813508	52.1329	0.0744008	7.24474	3.06611	3.31578
-0.235914	0.789885	29.1393	0.0364397	193.859	0.15917	42.6904	0.0955369	6.34699	0.587459	2.32659
-2.01321	0.188898	41.9378	0.0868456	305.027	0.132418	87.9649	0.11949	7.9004	2.94181	5.22341
1.2934	0.259942	36.7679	0.0647703	371.176	0.0936438	69.6262	0.100255	5.83096	3.86968	3.90813
0.994596	0.308478	32.6537	0.0429652	205.614	0.110666	34.3299	0.198605	6.91098	1.66823	0.261226
-2.21435	0.149953	57.298	0.0479108	378.885	0.103035	70.8169	0.0892494	9.8648	4.04613	3.45197
-0.345099	0.650913	31.1994	0.0398636	206.588	0.0832293	43.5128	0.0870103	6.03502	2.6324	2.56117
1.01947	0.3123	36.4755	0.0407994	284.246	0.117425	50.643	0.105296	7.55411	3.61092	2.64285
0.652286	0.404047	28.6629	0.0433936	234.455	0.086102	45.0683	0.0705083	5.86132	3.13487	2.99307
0.156851	0.841975	29.5614	0.0412931	205.409	0.100697	43.4469	0.0934274	6.30746	2.41084	2.25185
-1.36504	0.253423	41.5261	0.0699723	263.156	0.10776	69.8188	0.109718	7.77859	3.55848	4.17651
0.271355	0.754183	32.2296	0.0733219	218.107	0.0997566	46.3554	0.120362	5.78333	2.5336	2.40222
-1.95588	0.19086	55.982	0.0740506	325.519	0.0952485	78.8283	0.101653	8.94489	4.52797	4.82945
-0.4678	0.537217	30.1541	0.0410392	191.686	0.107675	42.8851	0.0842974	6.54698	2.0377	2.68545
1.43038	0.194041	31.4576	0.032484	260.527	0.0692793	38.9175	0.0919642	7.21919	4.08482	2.25502
1.59742	0.26773	46.7777	0.109063	350.109	0.118287	56.7023	0.0961551	8.19393	3.81125	3.26745
0.929008	0.430866	39.2672	0.0735756	284.945	0.113754	66.2447	0.144192	7.06105	3.24029	2.97706
-1.91499	0.20644	54.1528	0.092982	336.238	0.0865083	80.0314	0.109437	8.14017	5.05778	4.80793
1.36008	0.210156	38.0482	0.0320074	176.524	0.137046	35.1275	0.111495	8.27961	1.44859	1.82316
2.19788	0.132622	51.9081	0.0591273	354.615	0.105622	65.0644	0.106227	9.72882	3.66252	2.83572
0.0621516	0.931169	29.2383	0.0386049	208.014	0.102156	42.0629	0.104477	6.16805	1.93278	1.89184
-0.530903	0.510595	26.7146	0.0545631	233.169	0.0810055	44.1794	0.0862147	4.57792	2.87955	2.70937
-1.68007	0.206752	48.2086	0.0649303	315.198	0.136794	53.3462	0.0996611	8.72081	3.90213	3.23971
-0.0131169	0.987252	29.2955	0.0395198	209.004	0.0999626	42.604	0.102772	6.27681	2.4318	2.29729
-0.513478	0.496788	28.8856	0.0458292	217.052	0.0830552	40.6387	0.106514	5.39264	2.84877	2.1596
-0.083843	0.919312	29.2577	0.0383009	208.184	0.0988992	43.2221	0.101608	6.19019	2.1457	1.9115
1.62711	0.248138	45.7196	0.10704	351.678	0.110301	57.0001	0.0875801	8.05285	4.48746	3.92962
0.500978	0.49044	28.9708	0.04119	213.145	0.100659	41.8412	0.101216	6.2286	2.11495	2.12873
-1.60699	0.253257	49.4511	0.0861585	330.124	0.138318	56.403	0.103625	8.30682	3.42508	2.47156
-0.400164	0.69377	31.2861	0.0470554	174.012	0.211447	38.0146	0.140599	5.89693	0.983962	1.63498
-0.74181	0.418702	32.7429	0.0523213	223.559	0.0786067	40.098	0.120486	6.463	3.05894	1.68531
1.0037	0.316979	33.9204	0.0364748	214.163	0.103549	35.7442	0.178669	7.40295	1.89515	0.501701
-0.611196	0.515438	33.6412	0.0571923	175.703	0.14114	41.9092	0.0985162	6.70988	1.6226	2.19891
-0.036592	0.960753	29.3497	0.040862	207.933	0.103466	42.2363	0.104323	6.13272	2.44267	1.96801
0.256412	0.735572	28.9325	0.0485578	203.279	0.0969747	43.3665	0.0904442	4.77584	2.48556	2.46363
1.05103	0.259018	30.5733	0.0425914	255.039	0.068606	42.5676	0.0704727	6.35121	3.68738	2.97446
1.65344	0.20457	43.7617	0.0466898	404.238	0.0804755	75.2419	0.083866	8.67549	4.7937	4.62562
0.377857	0.617748	30.382	0.0400217	221.885	0.0931172	43.3855	0.0897271	6.47068	2.71337	2.45505
0.162331	0.832207	28.6949	0.0415278	215.478	0.105909	43.487	0.0934278	6.28547	2.47344	2.28355
0.0397754	0.955536	29.3356	0.0401317	208.634	0.0964872	42.3479	0.0971948	6.25225	2.38677	2.29013
-1.03524	0.28756	35.9516	0.0510964	289.579	0.140496	58.5773	0.116511	7.15388	3.55851	3.50982
-0.933677	0.327396	38.0355	0.0680341	197.537	0.140549	48.8235	0.102065	7.18904	1.09926	2.54556
-1.92415	0.187207	54.8073	0.0614863	237.595	0.155297	74.8967	0.100726	8.77915	1.22408	4.09074
0.755295	0.323441	27.7445	0.0421987	219.429	0.112092	43.0946	0.0777325	6.03285	2.04528	2.82857
2.14196	0.148176	51.1703	0.0633513	404.105	0.0697675	69.9489	0.0736118	9.76167	5.81127	5.15761
-0.356682	0.641963	31.2831	0.0504017	222.472	0.0997635	46.5237	0.108338	6.43631	2.51544	2.53468
-0.678573	0.494632	33.5278	0.0584255	188.324	0.130446	37.2925	0.113669	6.81495	1.77242	1.90522
-2.09649	0.158483	53.0795	0.0693511	355.295	0.113555	68.2377	0.0960318	9.03666	4.81523	4.14686
0.834414	0.426269	31.7649	0.0438067	212.275	0.0780908	34.0553	0.16315	6.95937	2.8735	0.938671
1.9195	0.152397	41.4288	0.0512662	406.596	0.0796046	74.4543	0.0796496	8.53999	4.85653	4.75524
1.04089	0.290166	38.9489	0.114419	245.805	0.0757913	51.7044	0.0996238	5.9565	3.65073	3.10412
-0.120176	0.889623	29.1753	0.0398409	220.436	0.143257	43.6828	0.10662	6.18291	1.14429	2.22382
0.467489	0.559392	31.5224	0.0479672	239.846	0.124909	47.6662	0.105036	6.2571	2.81081	2.63172
-2.28649	0.183681	37.7425	0.0959134	368.93	0.105396	98.1366	0.114424	5.23812	5.0873	5.39142
1.14205	0.23614	39.0403	0.0878957	242.121	0.0759464	52.2256	0.0870517	7.09655	3.46718	3.16106
-0.905441	0.325785	34.5697	0.0325463	226.991	0.0989387	42.0589	0.0796311	7.43352	2.8734	2.79802
1.13039	0.31165	43.9096	0.0911856	265.936	0.0686304	55.4969	0.0968765	7.50972	3.7766	2.96529
1.39153	0.214404	29.4891	0.047161	282.028	0.0497328	39.7292	0.101128	5.53906	4.4742	1.82686
2.37833	0.117922	46.2636	0.0735187	400.012	0.066939	64.3567	0.102148	7.63309	6.38665	4.16409
-1.29738	0.235754	35.0295	0.0429141	334.642	0.072203	54.6018	0.0838682	7.59055	4.21866	3.15165
0.615606	0.539522	30.6621	0.0450415	227.377	0.095175	37.6685	0.129198	6.51491	2.59841	1.32015
0.110287	0.881379	28.8396	0.0449332	212.37	0.102999	42.648	0.0976189	5.51601	2.40531	2.1912
-0.901574	0.410919	36.7839	0.0534025	314.842	0.112778	56.6641	0.0908205	7.02735	2.80495	3.14095
1.68233	0.240785	51.7088	0.0727056	344.692	0.121494	58.0147	0.0940102	7.8918	4.33063	3.35653
-1.00039	0.413968	35.1045	0.055699	179.826	0.177059	30.2162	0.284147	7.11864	0.401846	-0.747718
-0.672246	0.420783	30.3183	0.0512802	258.531	0.118021	49.7038	0.0977618	5.52777	2.94416	2.78402
-0.964171	0.292395	32.1095	0.0504819	231.877	0.0843281	39.521	0.121334	5.74909	3.25106	1.39075
-0.753089	0.434427	37.7603	0.0828339	214.451	0.108111	49.6856	0.104507	7.00169	2.00212	2.51135
-0.673581	0.46906	31.8175	0.0412815	220.718	0.100182	38.7411	0.0995624	6.882	2.41571	1.96128
-0.311827	0.70097	31.7231	0.052058	208.025	0.0867401	44.7175	0.0865379	6.09282	2.59946	2.43804
-1.88623	0.165811	41.5741	0.0571406	380.146	0.0923836	79.0241	0.0967644	8.50224	5.27038	5.27742
0.463304	0.569803	29.669	0.0375016	238.219	0.0851587	44.3154	0.0788293	6.4347	2.62409	2.69363
0.0225321	0.975919	29.3596	0.0419299	208.454	0.104923	42.488	0.0953263	6.01676	2.06639	2.33982
1.72811	0.245777	56.87	0.0659683	279.389	0.0917494	77.5303	0.0934539	8.13955	3.80851	4.05545
0.73943	0.44406	30.9142	0.0525734	216.234	0.0738728	35.9103	0.126959	6.23945	2.98331	1.6946
0.579035	0.429802	28.6501	0.0462145	214.823	0.101633	43.4577	0.0769097	5.66392	2.60266	2.83724
-0.350145	0.626765	28.7692	0.0401785	211.123	0.102251	43.4035	0.0930292	6.01288	2.52553	2.4759
0.050312	0.951524	29.4143	0.0421576	211.811	0.111367	43.3598	0.138603	6.27719	2.4156	1.79826
0.192473	0.784541	29.0074	0.0431257	207.748	0.0860165	41.9227	0.0923671	6.11366	2.52105	2.40144
-0.217947	0.777855	29.8688	0.0391745	204.752	0.0985638	43.7776	0.086912	6.20799	2.4346	2.1423
0.0107916	0.989604	29.3353	0.0456243	208.647	0.124665	42.4288	0.105467	6.17821	1.57452	2.04988
0.360151	0.665081	27.4173	0.0593931	224.164	0.0891438	40.9737	0.0933113	4.75734	2.63415	2.28326
0.449572	0.5796	29.8668	0.0354091	237.364	0.0872635	44.4611	0.0791646	6.58631	2.6415	2.67615
-2.23891	0.22451	46.5509	0.0967757	358.866	0.139343	96.2836	0.146169	8.55707	3.75433	5.23584
-0.602898	0.422535	28.3954	0.0424701	217.613	0.0816992	41.0491	0.101206	6.0469	2.90994	2.29378
0.0542689	0.947724	29.627	0.0521046	211.022	0.101298	43.413	0.135207	5.57249	2.26699	1.12379
0.303055	0.677048	29.7817	0.0317797	203.941	0.122129	41.4123	0.113272	6.22825	1.43415	1.62877
0.274325	0.704341	28.8044	0.0376204	216.381	0.0950987	43.1594	0.0908418	6.36039	2.59341	2.49602
-0.3771	0.627459	28.7023	0.0479135	200.545	0.106159	38.1686	0.144326	5.06939	2.38808	1.0755
-0.0771798	0.918721	29.5211	0.0411935	205.848	0.107543	42.0993	0.0983489	5.83745	2.3582	2.36038
-0.657984	0.42962	33.0881	0.0445903	215.861	0.101174	49.7344	0.0894587	6.84483	2.59498	2.90843
-1.42206	0.213194	36.2934	0.0522118	380.618	0.0736267	69.3565	0.0843894	7.15313	4.28427	4.18479
1.31211	0.205632	34.0157	0.0204393	240.9	0.0914062	39.9043	0.0715511	8.40393	3.28288	2.95001
-0.135592	0.867696	30.4193	0.0618294	218.015	0.115816	44.8121	0.133206	6.1199	2.37206	2.22649
0.515165	0.499895	29.6835	0.0414504	225.09	0.0886383	42.89	0.0865748	5.96489	2.89932	2.58007
0.111453	0.888322	29.5811	0.0426782	202.023	0.132552	41.7332	0.105868	6.29642	1.28497	1.89848
-0.329029	0.681477	31.3379	0.0517409	229.385	0.100039	47.5416	0.113051	6.44282	2.62334	2.51648
-0.701304	0.460131	34.1296	0.043103	225.028	0.087509	41.5838	0.102276	6.66734	2.59304	2.04665
-0.965295	0.313937	33.4402	0.0616101	298.003	0.103437	54.0644	0.0917782	6.09279	3.46814	3.07012
-1.09554	0.286146	40.6873	0.0988807	255.373	0.0740518	54.3745	0.0857135	6.99124	3.19645	3.22001
-1.56916	0.251068	48.7783	0.079664	312.526	0.163958	55.1899	0.0995269	8.3058	3.52721	3.56461
-0.484048	0.591727	30.0082	0.0471317	223.595	0.0947926	39.5755	0.111488	6.38438	2.58393	1.77136
0.298436	0.696077	29.7036	0.041452	224.113	0.0992909	43.4542	0.0922244	6.18836	2.6005	2.42261
-0.77121	0.381437	30.5111	0.0446578	229.819	0.0806296	39.6479	0.0760682	6.68527	3.1879	2.68603
-1.0332	0.298305	31.3219	0.0408822	254.126	0.064533	40.115	0.105985	6.755	3.66968	1.8289
1.63243	0.190164	41.012	0.0565131	370.063	0.102075	66.0465	0.118964	8.15628	4.11547	3.0259
-0.52163	0.618812	34.5112	0.064454	183.655	0.136949	42.969	0.0866866	4.38717	1.80006	2.57138
0.231969	0.763317	29.215	0.0441668	204.944	0.0946692	43.7388	0.0874851	5.58384	2.50933	2.26825
-1.04688	0.382002	45.07	0.110292	266.798	0.082673	56.7037	0.101471	7.13712	3.44736	3.16595
-0.112331	0.893003	29.7933	0.0458545	202.949	0.126923	42.5506	0.0965319	6.23587	1.4857	2.26812
0.141672	0.848683	29.3817	0.0377836	215.372	0.103092	42.7876	0.0985397	6.31351	2.4877	2.22274
1.01338	0.278243	37.6694	0.0580917	185.114	0.172084	46.4102	0.111522	7.61954	0.497855	2.34981
0.487836	0.520468	30.2437	0.0350076	221.731	0.0965231	43.005	0.0841479	6.70711	2.54744	2.60059
1.05988	0.327986	42.7556	0.0970557	254.04	0.0809091	55.2259	0.0893694	7.56769	3.48375	3.25595
0.355411	0.700823	30.7702	0.0547141	249.126	0.157866	47.8029	0.128045	6.14645	2.29307	2.50526
0.236316	0.737498	29.3922	0.0389681	209.563	0.108168	42.5333	0.105356	6.04103	2.01426	1.73131
1.64278	0.243718	50.2728	0.0803576	334.849	0.129376	56.5001	0.10344	8.27359	4.25651	3.18025
-1.19802	0.285789	41.5835	0.0731736	286.802	0.0899962	66.6727	0.109889	7.78387	3.49019	3.89493
0.560049	0.541027	31.3905	0.0481337	267.481	0.132836	50.5159	0.104021	6.51224	2.85166	2.75875
0.633897	0.43699	32.7621	0.0460695	222.446	0.0877121	49.6993	0.0850297	6.5795	2.9094	2.98782
-0.944372	0.332377	39.0283	0.0581629	201.588	0.131653	50.3253	0.0838479	7.13865	1.24683	3.23515
0.290726	0.729224	29.314	0.0450327	224.429	0.0968917	46.9575	0.112158	5.97433	2.33501	2.06006
-2.25226	0.135346	54.5425	0.0486338	365.908	0.104745	67.2178	0.0898119	10.15	3.82505	4.23531
-0.218244	0.792917	30.797	0.0566991	224.869	0.114376	46.5554	0.135382	6.34797	2.36892	2.30452
0.586629	0.533979	31.3092	0.0488533	220.619	0.0897689	38.5917	0.116956	6.43805	2.84518	1.72564
0.963874	0.287287	30.5306	0.0363965	212.594	0.12636	35.454	0.107725	7.00857	1.57118	1.6138
-1.42048	0.210774	36.1444	0.0501796	376.468	0.0761123	69.8769	0.0748901	7.35934	4.45822	4.27382
-0.239173	0.758671	30.768	0.0454526	203.477	0.0997104	42.7399	0.0956447	5.65616	2.09694	2.36978
-0.37771	0.615411	28.3221	0.0383194	223.887	0.0875727	43.3973	0.0868638	6.23907	2.68954	2.59639
-0.360509	0.648604	29.7076	0.0418692	191.628	0.1192	42.8832	0.0885631	6.17006	2.09778	2.5468
0.969568	0.305184	31.3227	0.0428056	253.25	0.0660628	42.0847	0.0751845	6.44602	3.62671	2.94351
0.439139	0.667634	31.6473	0.0515358	215.921	0.0837269	39.3947	0.113208	6.09906	2.64767	2.05924
-1.12699	0.215865	32.8093	0.0470653	273.353	0.110618	50.4392	0.0923116	6.6313	3.56729	2.81304
0.043861	0.952119	29.3192	0.0398895	209.667	0.09389	42.8206	0.0986733	6.27819	2.35544	1.90417
-1.71783	0.245829	50.2376	0.0869679	373.454	0.0966166	59.0334	0.0906711	8.00926	4.255	3.33103
-0.722549	0.416378	30.2485	0.0520379	273.318	0.113126	49.5717	0.102312	5.91648	3.11959	2.63617
1.41744	0.171032	32.5614	0.0716072	343.192	0.0805322	64.1616	0.0781232	4.98071	4.81316	4.6988
-1.46219	0.255919	44.6623	0.105745	295.147	0.158012	53.1265	0.0952622	8.02625	3.59697	3.49773
0.50304	0.588736	31.5388	0.0503621	261.731	0.136213	48.6313	0.113956	6.50965	2.36119	2.67238
0.162109	0.844797	29.179	0.0386778	222.847	0.127328	44.0019	0.100993	6.21365	1.72892	2.22558
1.22332	0.215837	31.467	0.0384315	211.929	0.0734829	33.5476	0.148694	7.0599	2.98201	1.16822
0.411377	0.603506	29.5738	0.0389772	229.93	0.091338	43.157	0.0892596	6.40081	2.7247	2.51381
0.149468	0.839875	29.3704	0.0400017	206.147	0.0956155	43.0339	0.0923781	6.25509	2.46626	2.32247
1.20085	0.272556	35.3132	0.0687029	351.238	0.102482	66.7266	0.107122	5.90984	3.97018	3.74584
0.112423	0.889601	29.1827	0.0386857	208.58	0.0957554	43.4615	0.0995068	6.29464	2.46094	1.99007
-0.048508	0.950332	29.4429	0.0427847	207.615	0.105621	42.6833	0.0961917	6.28045	1.95102	2.35321
1.15855	0.310926	44.0147	0.0677163	278.736	0.0984004	64.6909	0.118161	7.57594	3.09863	3.37527
0.03578	0.95933	29.2936	0.0402985	209.688	0.0933092	42.5224	0.09354	5.99447	2.14781	2.31267
0.792944	0.353569	30.8121	0.0413521	263.696	0.117293	49.3198	0.0959445	6.54136	3.29392	2.86304
0.0096123	0.991039	29.3388	0.0492562	209.699	0.106613	42.6866	0.15288	6.21839	2.20057	1.81876
-0.122968	0.869544	28.8466	0.0433082	211.141	0.100773	43.0713	0.0970449	6.01012	2.36169	2.37343
-0.285903	0.698711	27.8868	0.0457635	206.013	0.111049	42.4452	0.0936264	5.74907	2.20908	2.45485
-0.00398102	0.995792	29.2737	0.0441182	209.482	0.104038	42.523	0.0957426	6.17149	2.21317	2.3507
0.697669	0.473178	28.5993	0.0647034	236.611	0.0763206	37.7144	0.128095	4.48967	2.97718	1.3304
0.832522	0.385178	31.9927	0.04494	257.425	0.0657717	43.159	0.0913318	6.71453	3.32054	2.28065
-1.99151	0.183986	50.6703	0.0914217	392.634	0.0999108	69.6749	0.0965026	8.71924	4.31671	4.10771
-0.0621009	0.94165	29.2843	0.0402707	210.336	0.0952451	41.9561	0.113295	6.07166	2.22077	1.6452
0.229555	0.772584	30.9324	0.0554092	221.117	0.10166	45.9906	0.118161	6.35253	2.39048	2.29162
0.486166	0.508427	30.0547	0.0416473	200.385	0.0856886	42.9621	0.0888486	6.43189	2.57174	2.57068
0.468813	0.535693	28.0041	0.0430467	224.185	0.0973044	42.9729	0.0933033	5.49153	2.79592	2.46955
-0.516561	0.542456	26.8073	0.0570553	240.413	0.0960979	43.7605	0.0952217	4.40254	2.8188	2.38542
-0.418824	0.559804	28.939	0.0335071	209.617	0.114146	42.9066	0.0943877	6.53572	1.90372	2.39272
1.10959	0.324731	44.5781	0.0849088	263.714	0.0744225	55.5878	0.0912232	6.86151	3.36846	3.38788
0.669847	0.40461	31.0453	0.0460962	187.644	0.106417	44.1995	0.0782429	6.133	2.11425	2.78712
1.76905	0.288969	47.9314	0.0749355	332.511	0.125774	90.0501	0.137811	7.93069	4.26846	3.89159
1.80276	0.171919	51.993	0.0906835	230.475	0.0873528	57.3928	0.0925445	8.47936	3.2923	3.64342
0.777008	0.447853	28.7211	0.0634424	230.02	0.0771266	34.8382	0.175239	4.48348	3.06	0.468274
0.288807	0.698545	28.375	0.0515616	212.243	0.092238	40.7766	0.099542	4.65548	2.59919	2.28236
-1.11214	0.289999	41.7824	0.0896703	262.828	0.0600223	56.1103	0.0687024	7.81307	3.91838	3.87763
2.10887	0.175466	54.4323	0.0726132	423.416	0.073061	73.7599	0.0787649	9.08293	5.19771	4.08865
1.91951	0.202309	57.7473	0.0544672	254.463	0.111759	77.1642	0.0862949	8.64226	3.22853	4.47725
-0.126659	0.872913	28.3993	0.0596523	212.236	0.0946219	41.8972	0.0999198	4.24597	2.33795	2.27244
1.25857	0.235387	34.8455	0.0603418	337.781	0.106671	62.3062	0.102733	6.65758	3.93025	3.94405
0.119945	0.869765	29.7257	0.0420854	207.33	0.0978962	42.8056	0.0948291	6.24077	2.29125	2.36216
0.532173	0.59913	32.913	0.0675167	248.079	0.120258	55.1897	0.161814	6.58435	2.61005	2.15706
-1.1736	0.241002	32.1056	0.0415582	249.534	0.0726421	39.9553	0.100416	6.45368	3.77111	2.09435
0.42376	0.585703	31.3979	0.0366941	200.721	0.119549	42.0577	0.0941849	6.44604	2.02626	2.40764
-0.91962	0.326162	35.7464	0.0441648	262.542	0.13867	49.3776	0.108616	7.40514	3.07715	2.6194
-1.87469	0.178321	44.1699	0.0498145	424.883	0.0772514	74.8782	0.0924535	8.21551	5.38738	4.64693
-0.130864	0.871119	30.4785	0.0645192	216.329	0.108717	44.4559	0.124908	5.83898	2.21314	2.18266
-0.985792	0.3	31.3334	0.0427448	249.804	0.0763619	40.7212	0.0993474	6.43436	3.03189	1.87308
-0.928427	0.383663	35.7806	0.0523921	141.071	0.227134	39.4207	0.108834	7.06114	0.239288	1.72207
-0.376903	0.622335	30.4968	0.0391177	222.243	0.0989785	43.2711	0.0960951	6.52994	2.57368	2.15301
-1.11455	0.287863	42.2428	0.0898851	243.029	0.101899	51.6642	0.122164	7.40964	2.34526	1.9377
0.100689	0.886785	29.0015	0.0415801	208.811	0.0992962	42.1221	0.0974883	6.0534	2.25788	2.25182
-1.64903	0.204571	43.9364	0.0431038	398.689	0.0845699	75.1712	0.0820819	8.68529	4.88409	4.77931
-0.0995879	0.912131	29.878	0.051785	202.859	0.138591	42.4662	0.0955694	5.80297	1.78401	2.35431
-1.87865	0.152778	54.2407	0.067407	223.046	0.125749	56.7217	0.105559	9.14905	1.4338	3.2671
-0.295599	0.706157	30.7278	0.0373805	214.923	0.0989264	42.2913	0.100483	5.69572	2.34631	2.13398
1.50307	0.311394	46.6811	0.143156	354.736	0.119402	58.2253	0.101931	7.51497	4.17186	3.36122
-0.0952181	0.908082	28.8954	0.0463464	215.177	0.117831	43.2596	0.101279	5.35639	1.89726	2.14932
0.109141	0.925808	30.0953	0.0760637	211.212	0.0976481	41.7554	0.1161	4.94954	2.32258	1.53678
1.13393	0.317977	37.6826	0.0469645	183.817	0.167646	34.7422	0.198554	7.55981	0.632537	0.0640983
-1.96124	0.189867	55.8581	0.0566882	254.303	0.112727	78.4576	0.0828589	8.96036	3.30424	4.99524
-0.931593	0.412449	35.2313	0.0530097	180.988	0.166255	32.2106	0.195908	7.05483	0.681272	0.331761
-0.0609263	0.935773	29.0934	0.0427338	209.285	0.0979503	42.7854	0.0959913	5.82952	2.42397	2.1901
0.639432	0.407985	30.5067	0.0338112	191.99	0.128473	39.3452	0.112413	6.84733	1.91242	2.02934
-0.310769	0.711151	30.0951	0.0393159	188.634	0.155794	42.0771	0.096145	6.34784	0.921021	2.39318
0.193378	0.817274	29.9483	0.0422029	224.41	0.115288	43.6845	0.095074	6.2844	1.51658	2.39913
0.430329	0.590764	31.7949	0.0355382	208.205	0.102566	41.9718	0.0953307	6.15747	2.492	2.37058
0.0246985	0.97409	29.352	0.0413958	208.066	0.111537	42.3563	0.100974	6.17739	2.32951	2.29592
-0.0200463	0.980042	29.2295	0.0420786	208.331	0.113034	42.1891	0.137872	6.24474	1.97942	1.48732
0.132181	0.861614	28.9662	0.0424952	210	0.092408	43.3191	0.097401	5.48687	2.45884	2.3759
-1.02599	0.342121	34.1015	0.0542741	177.062	0.135817	30.0016	0.22537	6.75417	1.55789	-0.0603199
-0.523985	0.493141	30.9219	0.0359498	207.093	0.100593	41.4978	0.0957312	6.69657	2.57698	2.47312
-1.63092	0.34237	37.3203	0.083877	352.343	0.134586	89.4918	0.170688	5.71863	3.60227	3.13539
0.546993	0.476907	29.0625	0.0420784	215.93	0.0848636	40.0869	0.1177	5.93266	2.83264	1.89363
0.765662	0.454269	39.1992	0.0841742	223.463	0.0902393	50.8955	0.101439	6.52756	2.89856	2.84713
-1.28275	0.252801	36.7123	0.0495868	360.081	0.0941946	66.0386	0.0910087	7.75422	4.15238	4.03188
0.609744	0.500805	32.3989	0.0412736	266.774	0.133303	51.1401	0.101276	6.79871	2.97033	2.87126
-1.67538	0.261496	49.2174	0.0997423	369.236	0.101124	58.9411	0.0875287	8.19739	4.22621	3.4712
-0.387471	0.649248	29.5041	0.0385623	192.071	0.131741	36.7669	0.171401	6.38165	1.8983	1.08481
-0.198338	0.798322	28.8907	0.0401698	206.955	0.0960768	43.613	0.0916498	5.97303	2.46557	2.34772
-1.66897	0.157265	38.1625	0.0666147	360.308	0.0894431	66.0852	0.0974475	7.14495	5.12808	4.55006
-1.03535	0.292689	36.4532	0.034142	275.623	0.12268	49.8423	0.101729	7.66203	3.48276	2.90653
2.06481	0.184955	58.9337	0.0614535	346.561	0.0796374	80.3787	0.105136	9.23944	4.46585	4.48635
-1.46534	0.256517	43.5972	0.0658255	282.082	0.113238	73.758	0.114403	8.23346	2.94972	4.1906
1.04649	0.367896	44.4675	0.10541	261.485	0.0895664	55.4655	0.108707	7.06402	3.15132	2.98209
0.560651	0.495279	33.8043	0.0686072	226.338	0.0954237	48.2305	0.105647	6.40931	2.48268	2.47256
2.15401	0.155011	55.0755	0.0552497	368.368	0.106435	71.4461	0.0790991	10.0209	4.00968	4.89416
1.28675	0.215965	35.7352	0.0506338	308.509	0.142701	64.5155	0.0982382	7.43568	2.90728	3.91168
-0.123368	0.875437	29.1826	0.0408693	210.541	0.0924228	41.5092	0.107591	6.14687	2.40249	2.26747
0.6243	0.50624	31.9426	0.0410574	273.275	0.12084	50.0816	0.0961206	6.72119	2.66914	2.79462
-1.13905	0.305021	44.1688	0.0832241	264.392	0.073379	55.4586	0.0947907	7.53776	3.38974	3.10596
0.970649	0.372267	37.5101	0.0739117	271.879	0.118979	64.4789	0.134105	6.87753	2.87111	3.38421
-0.0535884	0.954231	29.571	0.0515859	205.156	0.15255	42.0079	0.116678	5.86391	1.91314	1.85164
-0.0802667	0.908788	29.2983	0.0407628	208.635	0.0937972	42.3923	0.0940514	6.11392	2.41445	2.33241
-1.09329	0.359392	21.9683	0.127654	305.936	0.0828855	48.8968	0.0747056	1.46243	2.83052	3.16495
0.400485	0.609563	28.0925	0.0506015	213.259	0.0912365	39.2909	0.108273	4.95927	2.68047	2.10556
0.563993	0.495697	27.2285	0.0460503	238.667	0.0956403	46.3083	0.0757416	5.41528	2.94499	2.83569
0.221624	0.770527	29.5221	0.037326	208.582	0.103065	40.9743	0.102342	6.26485	2.13346	2.24785
-0.137714	0.851682	30.0445	0.0465611	212.375	0.0908368	43.623	0.0970446	6.2084	2.48029	2.30123
0.578176	0.496371	34.4759	0.0607864	236.527	0.0738109	49.2878	0.0870353	6.62831	2.93193	2.81815
0.850952	0.310292	31.0709	0.0361206	168.951	0.16887	42.3445	0.0806073	7.08188	0.410488	2.75459
1.79494	0.145496	42.5915	0.0604713	286.571	0.157716	45.6762	0.147678	9.17661	1.8596	1.58809
0.120111	0.874022	28.7741	0.0448676	213.379	0.10157	42.9762	0.0940649	6.05753	2.4021	2.31685
-1.04134	0.33031	28.1138	0.0586152	251.164	0.0611813	34.6545	0.13742	4.91445	3.53726	1.09133
-0.361782	0.61932	29.3652	0.0324961	199.11	0.136008	40.4575	0.124704	6.52111	1.10623	1.40128
0.785644	0.400469	29.7252	0.0648114	287.45	0.103145	50.0796	0.111552	4.25876	3.20183	2.39281
0.724139	0.461733	30.7609	0.0507645	200.157	0.113618	33.3477	0.210006	6.30707	1.67671	0.178037
-0.135963	0.856103	29.1397	0.0416393	210.267	0.0920533	43.4613	0.0953723	6.13513	2.44623	2.27574
0.0604202	0.94551	29.1782	0.0421452	212.501	0.113611	42.259	0.0994988	5.80046	2.10286	2.17409
-0.579063	0.457092	31.1203	0.0454569	204.071	0.0813743	45.5606	0.0758348	6.22437	2.73851	2.84811
2.03003	0.188381	57.5155	0.070507	340.491	0.0818846	78.7638	0.111043	8.91691	5.05641	4.07833
0.0625606	0.933284	29.4557	0.0405843	207.639	0.099323	42.7101	0.0940342	5.87419	2.43392	2.15248
-0.809828	0.447781	37.6622	0.0755023	263.572	0.125448	60.6644	0.148435	6.92496	2.83607	3.09115
-0.804273	0.461093	36.9274	0.0729282	241.82	0.118849	59.8585	0.139851	6.91554	2.8955	2.98166
0.740284	0.415596	32.1017	0.0353242	275.02	0.121598	51.6151	0.0894884	7.06203	3.15611	3.08563
-1.08414	0.326182	43.1539	0.100017	257.208	0.0847845	53.5773	0.116615	7.38647	3.09063	2.19142
-1.1348	0.31727	38.2982	0.0683782	299.732	0.0899055	67.7992	0.123122	7.16827	3.67551	3.67494
-0.0886516	0.900275	29.0642	0.0407857	209.785	0.097905	42.4875	0.0959619	6.0691	2.46324	2.3517
-0.250098	0.728244	29.6853	0.035318	210.118	0.101554	42.1639	0.101693	6.39947	2.48314	2.19427
0.106728	0.885907	29.553	0.0428328	204.743	0.107934	42.1486	0.0964335	6.14937	2.32137	2.24917
-1.56358	0.306243	48.7442	0.12741	363.513	0.12336	59.2073	0.104982	7.88902	4.01788	3.23124
0.707507	0.498095	32.1896	0.0460508	216.606	0.0873231	36.3601	0.146702	6.79855	2.45085	0.921761
-1.08301	0.318637	41.603	0.0799322	265.11	0.112354	63.2382	0.119542	7.61226	2.7188	3.56756
-1.3162	0.284584	43.4719	0.0671668	237.915	0.156901	67.1487	0.125347	7.74168	1.40798	3.53859
-0.188053	0.800679	30.0302	0.0420592	213.696	0.0977337	42.7031	0.0967935	6.23794	2.45472	2.28555
0.969485	0.362153	36.9305	0.074049	278.917	0.102308	63.9229	0.129105	6.93383	3.33351	3.44853
2.15941	0.154926	55.4193	0.0593078	366.275	0.115431	68.4904	0.105279	9.29218	3.59687	2.70095
-1.53997	0.243465	44.3065	0.0653911	261.176	0.141775	73.2599	0.124275	8.19337	1.94466	3.66212
-1.96068	0.147522	53.3964	0.0724924	183.179	0.235364	53.6927	0.126432	9.38842	-0.280754	2.17195
1.7143	0.215267	51.5674	0.075205	261.793	0.115988	73.3774	0.10645	8.71221	2.47231	4.18119
-0.420391	0.606759	29.2912	0.0421746	234.851	0.0895133	43.4435	0.0889614	6.13201	2.69844	2.53325
-0.330182	0.714033	30.1616	0.0475624	179.543	0.193906	39.5109	0.119471	6.16963	1.11498	1.87319
-0.0516533	0.946316	29.4409	0.0425526	207.946	0.100841	42.7545	0.0970797	6.21139	2.39565	2.33495
1.02783	0.333348	37.7091	0.0419733	199.965	0.104471	39.4367	0.097323	7.29855	2.46365	2.29248
0.267628	0.726681	29.5071	0.0352925	223.468	0.102151	43.6041	0.091911	6.39645	2.45227	2.46496
-0.953169	0.42217	35.0951	0.0571513	175.68	0.184087	31.0406	0.236486	7.05511	0.344655	-0.225591
-1.16595	0.252725	35.9124	0.0347088	305.579	0.101599	54.9972	0.0739032	7.96669	4.08101	3.87148
0.402043	0.59504	30.7546	0.0410881	203.985	0.109375	41.4473	0.106813	6.51543	2.32513	1.97909
-0.12988	0.85735	29.2768	0.0403873	211.236	0.0968187	42.1859	0.0927009	6.2964	2.45281	2.37948
-0.212436	0.774786	29.9879	0.0420619	216.911	0.0970376	43.1404	0.0969113	6.34671	2.5305	2.28552
0.282961	0.720469	31.0473	0.0512654	221.504	0.102448	46.6928	0.114365	6.36984	2.53124	2.45134
-1.65779	0.230353	45.4272	0.104837	353.534	0.100903	55.8617	0.104645	7.80294	4.20995	2.8608
-0.880601	0.347633	34.4635	0.0347645	234.237	0.0890166	42.4566	0.0807045	7.35386	3.14649	2.66328
0.219058	0.777646	29.6667	0.0424593	195.715	0.135004	40.79	0.110875	6.26122	1.24119	1.84647
1.93073	0.179239	55.1472	0.0726082	309.28	0.111945	73.4598	0.122149	9.40764	2.68322	3.38929
0.683199	0.385607	32.1611	0.0663867	233.123	0.0683921	49.1341	0.0825971	6.0292	3.2557	3.1237
0.482432	0.591527	30.0923	0.0386106	168.991	0.229922	40.239	0.11942	6.54507	-0.129848	1.74416
1.78549	0.174243	51.2594	0.0979586	228.427	0.0897032	56.5048	0.103048	8.11205	3.28746	3.21034
0.176314	0.807009	28.6395	0.0417056	209.41	0.103153	42.6457	0.0945005	6.22553	2.18119	2.3968
0.48212	0.56983	33.771	0.067238	234.589	0.0803188	49.7127	0.0916049	6.44102	2.66105	2.36345
0.633087	0.475929	30.8013	0.0510654	212.185	0.102794	37.4822	0.130694	5.85254	2.55109	1.20791
1.98855	0.173396	54.9495	0.0558169	235.855	0.158699	73.0647	0.103074	9.2786	1.09881	4.16894
0.762424	0.420185	37.4059	0.0800852	221.506	0.0848457	51.0361	0.0898827	7.04932	2.97242	2.96677
2.01331	0.146836	43.477	0.0327295	389.968	0.0913094	70.4377	0.0811041	9.78042	5.46393	4.92172
-1.39574	0.233213	36.7958	0.0559182	377.007	0.095715	72.3567	0.0913289	7.37424	4.3345	4.25716
-0.354464	0.658571	31.3696	0.0492622	229.52	0.0977832	48.0318	0.1078	6.4742	2.65654	2.49928
1.75785	0.191022	43.4867	0.0988704	353.928	0.0795292	54.1485	0.0922514	7.12806	4.62617	2.97856
-0.997851	0.369549	39.2715	0.0609032	283.554	0.101155	65.5803	0.119204	7.18967	3.49272	3.2975
0.320581	0.685639	31.3982	0.0494975	225.071	0.0998705	47.069	0.11187	6.26956	2.60483	2.52126
0.384646	0.615395	30.8202	0.04344	195.281	0.117992	41.8693	0.112895	6.39366	1.39275	1.54361
-0.107651	0.90242	29.2803	0.0391567	213.575	0.103979	41.8767	0.102495	6.26522	2.40523	2.25917
0.388856	0.65112	32.2879	0.0521537	197.346	0.108745	43.8804	0.0871301	6.33117	2.15995	2.54197
-0.0763001	0.919174	29.0251	0.0432868	211.46	0.100325	42.2904	0.0967348	6.04209	2.46069	2.15853
0.00929698	0.990835	29.3159	0.0422413	209.817	0.113938	42.6657	0.138432	6.27689	2.37088	2.10449
-0.514759	0.480039	29.3108	0.0431254	208.49	0.0751801	43.4482	0.0830671	6.20308	2.79279	2.7148
1.34465	0.18425	32.7648	0.0468045	299.01	0.0934546	49.9863	0.100144	6.49359	4.22674	2.6451
-0.0462167	0.954721	29.4673	0.043687	208.738	0.0973545	42.1527	0.106608	5.63434	2.45454	2.09239
0.853224	0.323802	30.52	0.0406951	173.812	0.157561	45.2117	0.0693043	6.7641	0.582035	3.10217
1.13163	0.28328	40.4333	0.0792007	263.548	0.107683	61.7389	0.127474	7.18641	2.80938	3.32416
-0.274125	0.714615	27.7367	0.0496936	214.445	0.106376	42.4154	0.0968073	5.68724	2.27528	2.34375
2.10291	0.124928	40.9515	0.0434344	391.683	0.0785611	71.375	0.0744012	8.41701	5.83992	5.47366
-1.18921	0.277894	41.1618	0.0777972	281.105	0.0869255	63.5804	0.123445	6.92505	3.50917	3.10322
0.663702	0.430951	32.7209	0.0448814	216.464	0.0973805	50.4397	0.0881806	6.74283	2.66186	2.93625
-0.565717	0.496559	34.0307	0.0664615	230.057	0.083535	48.6869	0.0976125	6.67446	2.95453	2.83625
0.00652003	0.99373	29.2789	0.0405988	209.622	0.109564	42.4862	0.0974825	6.09336	2.20752	2.34254
0.130485	0.860186	28.9281	0.0416229	207.513	0.102461	41.2768	0.116827	6.07786	2.13269	1.48905
1.20697	0.253773	36.7715	0.042187	315.117	0.136324	65.0251	0.101863	8.04632	3.24598	3.99008
-0.599835	0.425566	29.792	0.0384556	190.062	0.0990889	42.4512	0.0827973	6.64827	2.17985	2.7942
-1.03883	0.306243	34.3831	0.0570951	309.22	0.0938084	53.6103	0.0899043	6.6273	3.71266	3.26154
0.0779646	0.918273	29.1227	0.0399147	211.528	0.100029	43.1372	0.0997878	6.28706	2.37609	1.94667
-0.692301	0.406613	32.7899	0.0433524	209.727	0.106387	49.556	0.0806987	6.87892	2.44877	3.0707
-0.490809	0.617951	32.963	0.0693957	251.968	0.121194	54.0866	0.160135	6.55165	2.29474	2.15881
0.163341	0.819429	29.1164	0.0399098	213.407	0.100648	42.6881	0.100636	6.11704	2.40825	2.13145
1.26768	0.203428	34.638	0.0305804	284.444	0.125677	50.9352	0.0846139	8.23394	2.6549	3.12266
-0.437488	0.59517	32.7722	0.0561252	221.217	0.0936547	47.9827	0.106783	6.55546	2.73706	2.60559
-0.102427	0.908957	28.5856	0.0609608	215.808	0.121092	42.821	0.0954282	4.7293	1.59446	2.27467
-1.02423	0.301953	34.0191	0.0589841	298.026	0.0968097	51.4103	0.101277	6.31164	3.79314	3.04016
-0.398963	0.586485	30.5075	0.0376759	209.361	0.0799936	43.4198	0.084033	6.58316	2.6755	2.624
-0.238874	0.76087	29.6688	0.0393836	200.286	0.11884	40.0109	0.124509	6.36772	2.03073	1.64112
1.36667	0.243809	37.3148	0.0563846	358.845	0.122063	69.986	0.113156	6.46124	3.92447	3.47493
0.317047	0.712247	30.2392	0.0430681	184.828	0.170254	40.8645	0.113954	6.32212	1.30075	1.82157
0.623273	0.505382	30.591	0.0514247	212.567	0.0896254	36.7978	0.149805	6.45685	2.41867	0.86115
-0.5245	0.493417	30.5982	0.0369935	190.259	0.158929	41.1009	0.106726	6.69015	0.626726	1.87503
1.12339	0.221437	31.8163	0.0363302	235.768	0.100777	41.5324	0.0777183	7.17844	2.38996	2.58488
0.714808	0.482512	28.9799	0.0606547	233.915	0.0807669	36.476	0.148258	5.01175	2.90609	1.04882
-1.71529	0.243872	56.3898	0.0671176	273.638	0.106626	76.344	0.100771	8.0611	2.75132	3.952
-0.295642	0.703797	30.96	0.0445449	201.107	0.099666	42.766	0.09558	6.37671	2.32496	2.36994
2.30244	0.14578	52.7062	0.0625783	432.716	0.0626009	73.9382	0.0701242	9.16828	5.75533	5.25102
2.27939	0.130651	50.1198	0.0668707	364.377	0.0976043	68.9376	0.0858886	8.54432	5.33941	5.51403
0.315156	0.711167	28.1911	0.0484017	232.21	0.108438	43.8551	0.095551	5.08734	2.43508	2.39727
0.157231	0.842345	28.6511	0.041718	199.075	0.132141	39.875	0.146398	6.28268	1.92435	1.7999
-2.06249	0.150763	44.2774	0.0334979	437.216	0.0604795	75.2306	0.0684481	9.64287	5.64642	5.13431
-0.205075	0.799619	29.9649	0.0433516	196.581	0.132038	41.9044	0.101241	6.32667	1.96809	2.25222
0.140862	0.868047	29.8725	0.0419036	203.714	0.120224	41.0742	0.121651	5.38628	1.31297	1.58873
-0.430735	0.617974	33.7764	0.0759145	228.382	0.0923611	47.642	0.106813	6.42572	2.7126	2.62592
0.0796902	0.911335	29.0907	0.0409352	208.146	0.100953	41.9523	0.104678	6.24779	2.12154	1.93646
-1.11013	0.338205	37.1234	0.0661304	354.965	0.118168	68.8078	0.116793	6.70568	3.18391	3.40345
-0.194468	0.825954	29.9179	0.0458539	193.01	0.173707	40.749	0.122952	6.323	0.681737	1.23774
-0.517086	0.499269	30.1564	0.0366769	214.424	0.100791	41.071	0.103134	6.60743	2.5973	2.09441
-0.137537	0.870856	28.0567	0.0739507	206.975	0.0929337	40.4616	0.142359	4.55011	2.4676	1.56987
-1.08183	0.342872	43.1933	0.0753072	283.684	0.0893207	64.9549	0.116763	7.2467	3.46325	3.53565
0.720857	0.445978	32.0468	0.0392181	227	0.0981418	39.0824	0.0999589	6.94647	2.53232	1.76498
-2.49301	0.149789	43.4071	0.0640882	456.825	0.07968	92.3178	0.0968718	9.50713	6.40681	6.50759
1.41586	0.191304	33.617	0.0796365	363.616	0.0752404	65.0084	0.101967	4.075	4.63324	3.78407
0.939189	0.353345	35.1587	0.0488629	156.433	0.170074	43.8152	0.070513	7.17751	0.953183	2.97668
0.139504	0.857709	29.4066	0.0414024	200.308	0.12926	41.008	0.122549	6.18952	1.47761	1.54871
-0.186728	0.800867	29.3496	0.0417848	201.519	0.118103	40.8441	0.111929	5.97015	2.00825	2.0574
0.710697	0.380732	31.0585	0.0273205	185.99	0.138017	37.5119	0.121505	7.09668	1.67562	1.84023
-0.554616	0.511901	34.3846	0.0643172	229.878	0.0840147	48.819	0.0947024	6.70806	2.92361	2.83273
-1.76176	0.153904	39.3466	0.057969	382.817	0.0797324	69.7546	0.0955258	7.98228	5.42242	4.66937
-0.383147	0.605898	29.7267	0.0408748	217.968	0.0927993	42.2972	0.0986865	6.25519	2.53437	2.30581
-0.366848	0.635009	30.4419	0.0423786	193.585	0.124509	42.885	0.0957279	6.47911	1.16162	2.32021
0.108704	0.892887	29.2617	0.0386246	204.86	0.112687	42.8763	0.0957668	6.27949	1.79948	2.36762
-0.454948	0.547276	28.0151	0.0440864	214.123	0.0929618	40.0471	0.0906472	5.93288	2.69183	2.39762
1.12999	0.253494	32.8373	0.051779	171.153	0.134578	31.0802	0.130237	7.13493	1.43608	1.32681
0.0717553	0.9274	29.1244	0.0420002	209.151	0.0944157	43.0125	0.0994904	5.61571	2.43675	2.15959
0.567598	0.566804	31.673	0.0507018	278.445	0.139699	51.6839	0.113782	6.49179	1.83033	2.65259
0.953816	0.347303	33.8979	0.041505	228.973	0.0689027	37.8554	0.140172	7.17082	3.33373	1.3184
0.493501	0.570707	34.3368	0.0702962	234.513	0.08918	49.1828	0.101843	6.38394	2.78932	2.70959
0.580354	0.476731	27.9239	0.0565386	235.136	0.0793691	41.7406	0.104756	4.28789	2.98556	2.04591
-0.52031	0.502304	31.2178	0.0465852	193.35	0.11277	42.6944	0.0976607	6.39235	1.62259	2.17862
2.03969	0.135998	39.813	0.0571865	356.251	0.102875	76.485	0.0969473	8.49	4.81938	5.38813
0.296709	0.679051	29.2356	0.0373353	211.706	0.10632	43.6071	0.0942814	6.22303	2.15824	2.42001
0.793088	0.453295	31.2158	0.0386271	251.238	0.0758418	39.6461	0.0834885	6.91111	3.08999	2.31012
0.109876	0.880147	28.8908	0.0426059	209.991	0.0990967	41.925	0.0998836	6.2373	2.29345	2.19414
0.100382	0.898326	30.0475	0.0554761	207.939	0.0943757	42.8726	0.0961152	5.95779	2.4678	2.36733
1.23141	0.233747	42.5072	0.0645939	248.374	0.0740517	52.0446	0.0919192	8.11938	3.61394	3.53925
0.413487	0.701317	32.4287	0.0778862	245.953	0.143715	53.3723	0.201155	6.43802	1.98362	1.87056
1.48521	0.246694	41.17	0.132819	319.726	0.119275	51.6074	0.115461	7.19795	3.74993	2.73811
-0.737332	0.368609	31.9938	0.0350592	188.269	0.100631	44.1036	0.0683463	7.15112	2.22529	3.0954
0.407292	0.61708	29.7837	0.0475457	219.316	0.0989423	47.8313	0.103227	5.61296	2.47101	2.6029
0.25106	0.761717	30.1507	0.0409219	194.746	0.138673	42.5383	0.0960326	6.26905	1.19412	2.29689
0.0370845	0.962569	29.5364	0.0533199	210.489	0.101573	43.0579	0.126484	5.98143	2.34171	2.02752
-2.15676	0.156743	55.3324	0.0572413	369.873	0.102056	71.1304	0.0794549	9.43416	5.17844	4.96797
-0.927214	0.343004	36.3605	0.0425433	280.178	0.128112	52.4342	0.0960118	7.42808	3.05677	2.89939
-1.25938	0.213256	34.4648	0.061039	314.897	0.116512	59.3921	0.11262	5.98422	4.22576	3.74177
1.00046	0.291675	38.2735	0.0563798	196.774	0.136719	48.5626	0.0960499	7.61648	1.11736	2.66736
-0.319795	0.687372	29.7551	0.0426748	189.933	0.135637	41.9388	0.0998633	6.19642	1.80334	2.23138
-0.879414	0.306561	31.0198	0.0583242	221.71	0.0700061	39.6149	0.0994094	5.52525	3.23013	2.32679
-1.73428	0.299652	47.275	0.0830342	326.476	0.140357	88.3598	0.153159	8.0672	3.38791	4.11605
1.78593	0.229822	53.3876	0.0723164	286.095	0.094164	80.2445	0.0971369	8.13406	4.11794	4.4206
1.04112	0.364257	42.8505	0.0841349	280.622	0.0986752	65.1676	0.119109	7.03945	3.33618	3.39728
-0.17041	0.818474	28.4548	0.0474797	212.283	0.099587	42.0236	0.0943669	5.71185	2.41174	2.33479
-0.290118	0.682206	29.1196	0.0401603	211.246	0.107779	42.8619	0.105676	5.76392	2.10514	1.76289
2.10172	0.153001	49.712	0.0800807	390.89	0.0855788	66.2142	0.104776	8.44049	4.74561	3.46827
0.182081	0.795588	29.0696	0.0427237	208.282	0.0856449	42.1227	0.0894575	5.9923	2.50311	2.41495
-0.0504571	0.945047	29.4482	0.0423801	208.414	0.0976743	42.6742	0.0959975	6.27875	2.3542	2.35344
-0.148285	0.844664	29.4309	0.0408267	200.709	0.11776	41.2228	0.10836	6.26664	2.17405	2.26631
-0.705177	0.43768	25.8004	0.0699759	253.613	0.101283	46.2455	0.0892285	2.95668	3.12439	2.62536
0.44993	0.537966	29.4412	0.0422445	206.685	0.0864601	43.9672	0.0827565	6.42489	2.27547	2.68589
0.952343	0.290841	28.5577	0.0615019	282.759	0.0956105	51.877	0.0791936	4.28912	3.70267	3.38777
-0.403907	0.647968	30.3209	0.0461119	174.486	0.192168	38.9696	0.120253	6.3679	1.03708	1.70753
1.58881	0.204184	44.6528	0.0786414	293.691	0.144144	50.8052	0.0995601	8.396	3.67923	3.54955
-1.74145	0.151278	38.3362	0.0672352	374.114	0.0842941	69.2301	0.0894365	6.59022	5.3415	5.09878
0.828908	0.363483	25.4255	0.0824331	261.22	0.0676425	44.8962	0.0744894	2.68543	3.29063	2.99954
0.265422	0.750313	28.4036	0.0465552	223.404	0.0968186	42.0217	0.0869533	5.90203	2.43611	2.44084
-0.0343734	0.961446	29.2828	0.0385495	209.537	0.0973293	42.6521	0.096216	5.82291	2.26764	2.29969
-0.320617	0.708189	29.9111	0.0480248	219.14	0.0959157	47.5389	0.113685	5.45932	2.57414	2.2081
-0.219533	0.781846	31.1257	0.0567825	219.394	0.104753	45.3068	0.117029	5.67959	2.51793	2.41515
0.345188	0.657066	31.1898	0.0410569	205.504	0.112705	42.1134	0.100142	6.39253	1.85013	2.18419
-0.695454	0.485644	29.9288	0.0487173	238.836	0.0828894	38.5263	0.110766	6.26078	2.94214	1.72451
0.153247	0.835562	28.5337	0.0475888	210.233	0.0973455	41.6315	0.100028	5.84314	2.48887	2.31246
-0.364077	0.645529	31.2285	0.0496996	229.22	0.0960776	47.8052	0.107667	6.49296	2.67371	2.56598
-0.338007	0.656749	27.8524	0.0521954	221.489	0.091032	43.4697	0.0939788	4.45006	2.63164	2.46883
0.462806	0.548862	30.4334	0.0358335	220.774	0.092266	42.3633	0.088445	6.64627	2.78465	2.55094
-2.27639	0.145559	51.4134	0.0734493	425.494	0.066179	71.7053	0.086758	7.39669	6.22124	4.0852
0.0525189	0.955574	29.5633	0.0509294	206.129	0.1344	42.6928	0.0966787	5.87319	1.10529	2.32406
0.00792709	0.991876	29.2909	0.0396422	209.562	0.100479	42.4794	0.0974731	6.19612	1.9872	2.28278
-0.827782	0.450129	34.3584	0.0588571	193.403	0.106692	34.4651	0.145999	6.95422	2.32392	1.33757
1.72071	0.231756	47.4298	0.105181	365.685	0.102088	56.6437	0.118102	7.28595	4.23545	2.08652
1.38358	0.204588	35.9514	0.0510713	331.125	0.125649	67.4542	0.0945103	7.1968	4.25791	4.54977
0.403964	0.596775	30.6866	0.0393897	197.245	0.0997449	43.508	0.0836793	6.54242	2.25134	2.62981
0.535764	0.479652	30.3878	0.0377087	200.17	0.122154	40.3267	0.119445	6.67316	1.63144	1.53053
0.0755874	0.919511	29.4509	0.0401609	209.864	0.0960321	42.1941	0.0963113	6.10979	2.45738	2.35722
-1.61604	0.222462	45.8936	0.0903328	314.195	0.124271	53.0961	0.0929748	7.98042	4.23804	3.7403
-0.67751	0.482846	31.9192	0.0430475	227.723	0.0846144	39.1021	0.0943407	6.80412	2.995	2.29087
0.92649	0.357127	34.06	0.0492175	178.581	0.139791	33.8561	0.125162	7.27808	1.49018	1.60904
0.0494484	0.949693	29.0642	0.0471004	208.855	0.0957235	42.6864	0.0972776	5.18132	2.40161	2.34307
-1.09398	0.38034	47.4201	0.0989082	273.02	0.0857954	57.8947	0.104926	5.70402	3.22502	3.0272
1.1265	0.320196	37.5502	0.0481408	185.052	0.165455	34.9708	0.196958	7.5399	0.656923	0.0758508
1.54268	0.206819	43.1054	0.0446901	326.035	0.160469	66.4385	0.113775	8.57752	2.55889	3.5146
-1.03511	0.368535	43.8763	0.107616	266.361	0.0721541	56.7791	0.0892571	7.2405	3.54382	3.40186
-0.119461	0.875642	29.6439	0.0416836	204.642	0.108254	42.6527	0.0933134	6.21566	2.27566	2.36161
-1.04605	0.316148	37.1578	0.0505592	301.379	0.149726	62.87	0.121099	7.53306	2.99903	3.26785
-1.92413	0.182414	51.246	0.091823	327.279	0.0812428	78.0299	0.101828	8.91997	5.10819	5.29487
-0.021642	0.979918	29.2988	0.0393622	207.91	0.130658	42.5171	0.0951936	6.16975	1.15757	2.28852
1.62182	0.195784	43.0099	0.0968808	312.158	0.107023	52.5168	0.0878183	7.79329	4.54315	3.56208
-0.308861	0.676506	30.6684	0.0392649	215.35	0.0757528	44.0293	0.0830502	6.19979	2.56703	2.47181
-0.651938	0.418436	33.6098	0.0608476	225.409	0.0907531	48.1129	0.0951827	6.57376	2.44874	2.7463
-0.462603	0.585879	25.5792	0.0839679	220.886	0.0962645	40.2841	0.0984976	3.08027	2.73839	2.24034
0.243222	0.827681	30.5435	0.0549343	223.048	0.116252	41.7333	0.0977562	6.07064	1.63318	2.25885
0.672473	0.406752	31.6723	0.0414844	185.645	0.110614	43.3325	0.0806355	6.84752	2.03831	2.75458
0.267643	0.764363	30.4393	0.0413921	195.541	0.130195	43.699	0.0868635	5.83082	1.88527	2.2766
0.172038	0.821631	30.2617	0.043573	214.161	0.0963182	42.9783	0.0936174	5.57221	2.47692	2.40218
-0.292588	0.685554	28.793	0.0379552	216.526	0.100563	42.9264	0.0987701	6.30376	2.38158	2.2375
1.24141	0.244233	36.525	0.0323946	303.894	0.109703	51.9643	0.0934487	8.02847	3.46385	2.97232
0.485876	0.650691	32.2487	0.0506226	207.647	0.104034	37.9849	0.139628	5.52212	1.97221	1.30986
0.104371	0.888268	29.9413	0.0489857	212.612	0.0927085	43.3889	0.100065	5.99583	2.09789	2.3159
0.00694845	0.992544	29.2747	0.0408157	209.367	0.0958568	42.5498	0.0986042	6.02973	2.44671	2.2442
0.198035	0.783827	29.1081	0.0419673	209.328	0.100315	41.4949	0.0984206	6.07649	2.2582	2.27958
0.37238	0.757883	31.8503	0.0647248	214.278	0.0940683	39.3906	0.137557	5.05187	2.48776	1.35253
-1.37889	0.265711	36.3455	0.0435489	139.484	0.325975	24.3837	0.330438	7.82177	-0.912905	-0.878412
0.21733	0.778188	28.8156	0.0396013	204.969	0.103554	43.3981	0.0931935	6.25555	2.0273	2.42455
0.335957	0.642024	29.5211	0.0340566	216.053	0.0990857	43.4246	0.094149	6.40459	2.62595	2.42226
-0.0236207	0.973932	29.2125	0.0424881	209.706	0.0970187	42.4593	0.0950912	5.89528	2.42789	2.35148
0.111666	0.893011	29.3966	0.0373631	202.105	0.138299	42.4297	0.0973043	5.98597	0.918825	2.23014
0.567502	0.652225	35.7062	0.0906721	177.169	0.179098	43.3318	0.0871215	4.18128	1.22369	2.52635
2.01229	0.172653	55.0275	0.070228	315.154	0.109211	74.729	0.122351	9.58451	2.84959	3.48411
0.0615913	0.935523	29.3912	0.0408366	206.487	0.109638	41.9522	0.111078	6.28028	2.0232	1.57579
1.3234	0.362077	36.6249	0.0764978	328.854	0.12763	79.8561	0.156811	7.00312	3.40434	2.64687
0.470066	0.583461	33.2665	0.0522929	215.467	0.100515	48.6183	0.0988559	6.34345	2.59012	2.65239
1.00159	0.340434	28.6548	0.0518368	245.371	0.0700982	35.0489	0.132903	5.51075	3.42666	1.16527
2.04662	0.151755	59.4885	0.052979	229.347	0.0983426	62.9018	0.0659604	9.13758	2.93358	4.23457
-1.58124	0.292101	39.8629	0.0794155	326.926	0.123378	84.4068	0.140853	7.37804	4.06588	3.91673
-0.551996	0.50139	32.0946	0.0443449	186.595	0.119398	41.9849	0.0985868	6.75398	1.89169	2.19055
-1.70526	0.223498	46.8823	0.0948849	358.978	0.0991095	56.0505	0.108463	8.19442	4.64001	3.20517
-0.96293	0.319209	30.098	0.049772	232.179	0.0835519	36.0665	0.106824	5.60657	3.22856	1.72968
-0.457574	0.64774	31.7443	0.0541587	263.931	0.154614	48.9335	0.122975	6.49352	1.42252	2.51138
0.0673821	0.928722	29.4261	0.0409953	208.112	0.099283	42.0286	0.104759	6.28301	2.43159	2.01193
0.0297185	0.970568	29.5039	0.0560544	209.605	0.0972143	42.8828	0.119118	5.27282	2.30462	2.18303
-0.293753	0.758371	31.5752	0.0717789	232.017	0.136192	49.3682	0.180954	6.37358	2.50021	2.11751
0.149106	0.838896	29.4279	0.0364698	215.617	0.102411	43.0272	0.0954996	6.10626	2.49319	2.3899
0.216442	0.796586	28.3822	0.0441441	222.874	0.113832	44.3094	0.092413	6.1418	2.10254	1.99573
-1.63533	0.301051	51.6488	0.108749	380.321	0.113556	62.221	0.0858244	7.70137	3.98701	3.58185
0.511389	0.561877	27.2632	0.0483707	244.453	0.0897913	43.4144	0.0921444	5.28115	2.43299	2.45814
0.359897	0.700552	30.9983	0.0512756	207.792	0.103989	39.4394	0.130405	6.43712	1.98247	1.23513
-0.237697	0.742626	30.1546	0.0443223	209.919	0.0860371	43.4204	0.0926464	6.31413	2.56128	2.45653
-0.478193	0.668623	34.4877	0.0987177	233.091	0.13223	53.9389	0.192674	5.84653	2.54661	2.27433
-0.218414	0.759675	28.4156	0.0425021	206.986	0.104474	41.324	0.0999786	6.16796	2.09538	2.17535
-0.512417	0.522243	28.621	0.0304158	235.212	0.0939552	43.9981	0.0784346	6.66883	2.88943	2.77128
0.0104076	0.988474	29.3101	0.040532	209.434	0.0951492	42.4941	0.094876	6.14759	2.02269	2.33981
-0.169471	0.818199	30.1993	0.0458513	211.976	0.0867266	43.1967	0.0945473	6.20227	2.40855	2.39661
-0.370232	0.609856	30.1332	0.0416349	212.661	0.0745122	43.2854	0.0859259	6.38391	2.72055	2.61387
0.813928	0.527146	37.741	0.0970206	252.853	0.134263	63.5885	0.185873	6.75999	2.91149	2.69337
-0.0700187	0.928554	29.4026	0.0403638	208.514	0.099707	41.8986	0.109899	6.25348	2.11642	1.79695
-1.48727	0.217497	42.9076	0.0595523	235.016	0.161539	67.5236	0.11105	8.34021	1.21009	3.94099
-1.70875	0.23362	52.9716	0.0788555	271.351	0.101052	76.1829	0.0983935	8.18727	3.7388	4.42046
-0.132674	0.879939	28.6255	0.0508319	213.354	0.0942856	43.7898	0.104534	5.64112	2.12823	1.93477
0.593854	0.4741	26.6214	0.0554226	237.043	0.101856	45.6339	0.0803412	4.36767	2.77074	2.76973
-0.848876	0.459725	37.4347	0.0601007	308.867	0.129968	55.1024	0.106901	6.79852	2.51012	2.98691
0.528192	0.557528	30.1241	0.0403424	217.553	0.0938553	50.2451	0.0858301	6.51936	2.71398	2.17722
0.30851	0.667757	29.6059	0.0342258	209.375	0.110949	42.0012	0.107311	6.44684	1.94937	1.84931
0.38902	0.605876	27.9992	0.0440761	222.541	0.0963283	42.5808	0.106704	5.65402	2.56918	1.8262
0.961152	0.274996	32.5219	0.0403798	222.073	0.102159	40.587	0.0993217	6.89373	2.72652	1.98089
2.21068	0.169064	53.0139	0.0574816	253.552	0.12839	86.3664	0.0906764	9.40909	3.09687	5.54389
0.599076	0.473661	34.2018	0.0587498	232.633	0.0851388	50.2641	0.0883839	6.83762	2.73191	2.91105
1.86709	0.175094	42.4773	0.0547423	432.145	0.0651786	82.5901	0.0868213	8.10478	5.33883	4.90129
0.804514	0.320237	30.9939	0.0392514	177.358	0.11718	42.1839	0.0779893	6.81465	1.79206	2.81661
0.441058	0.669904	33.4665	0.0724632	184.779	0.147277	42.3984	0.100171	5.63848	1.64633	2.13986
-0.379841	0.596655	29.0128	0.0347513	211.677	0.109132	43.1347	0.0979761	6.45261	2.05719	2.16719
-0.301187	0.703308	29.5641	0.0421038	227.837	0.0996277	43.6486	0.0925813	6.29057	2.55395	2.44681
1.53514	0.310204	47.7851	0.137976	361.312	0.118259	59.0474	0.102316	7.48474	4.12082	3.1523
0.218026	0.812836	29.9955	0.0442238	191.754	0.182711	41.9456	0.104339	6.32532	0.340372	1.99575
-0.0615055	0.944323	29.6826	0.0544711	205.534	0.128694	42.2474	0.0981027	5.29307	2.12274	2.32819
0.262044	0.718392	28.4655	0.0456391	215.383	0.100666	42.9247	0.102103	5.35592	2.38999	2.14671
-1.19349	0.288367	39.8916	0.0794668	284.89	0.0954089	67.0963	0.123851	7.08633	3.45203	3.61673
-1.93708	0.186125	54.8623	0.0599556	241.826	0.151398	75.861	0.0989146	9.02202	1.32824	4.3811
1.05047	0.374088	43.1931	0.0891594	287.265	0.0940632	65.9848	0.128045	7.34209	3.51676	3.42671
-0.620089	0.522351	31.6734	0.0481872	276.824	0.122609	49.5678	0.109576	6.63193	2.19509	2.74337
-0.668437	0.428047	32.4217	0.0475796	228.963	0.0845153	51.8661	0.0843887	6.30971	3.02062	3.0449
0.0751016	0.927978	29.3012	0.0398112	210.318	0.0958357	41.8578	0.113078	6.28343	2.45759	1.50043
-0.4976	0.492633	28.4703	0.0345326	199.751	0.126621	41.8818	0.09398	6.28845	1.90816	2.4463
-1.29343	0.229536	35.1318	0.0637668	349.138	0.096359	67.1631	0.0880917	6.21178	4.34486	4.2436
0.438321	0.591217	29.7431	0.038758	233.024	0.0885504	43.0774	0.0892737	6.33747	2.68657	2.5506
-1.56989	0.310816	49.6127	0.122671	371.49	0.111925	61.4502	0.0805263	7.7697	4.07457	3.85495
-2.42655	0.11788	47.1998	0.0655656	420.923	0.0526515	69.1592	0.0718101	8.28329	6.89132	5.68912
1.83763	0.189166	56.773	0.0879644	229.979	0.135016	58.8314	0.125227	8.69035	1.3098	1.75068
-0.403073	0.70914	32.321	0.0827491	246.317	0.158568	52.9549	0.216258	6.36625	2.48802	2.40076
-2.05478	0.173205	52.7327	0.0716925	407.311	0.0805335	72.467	0.0743336	9.58681	5.56126	5.38841
0.791389	0.309989	29.5351	0.0447212	188.563	0.108235	43.5058	0.077651	6.40111	1.59396	2.86437
-1.17428	0.216918	31.2081	0.0433652	227.779	0.0893624	37.2525	0.120594	6.20063	3.08461	1.65799
0.219773	0.759768	29.5279	0.0424583	202.965	0.0962167	41.9224	0.090838	6.27803	2.49	2.40882
0.371909	0.74725	32.511	0.0868811	239.821	0.154094	52.7711	0.226764	6	1.98684	1.1686
-0.241299	0.755738	29.4997	0.0399172	198.669	0.12267	39.8383	0.12269	6.31444	1.97837	2.03175
-0.712623	0.365608	27.7874	0.049061	233.149	0.0851311	44.8779	0.0655119	5.37215	3.1988	3.17794
2.42958	0.11415	46.411	0.0658746	415.578	0.053783	67.0381	0.0847897	8.81245	6.88707	4.95298
-1.15218	0.23825	35.1727	0.0478348	290.713	0.141686	60.4566	0.105023	7.5549	2.70022	3.58412
-1.64674	0.194906	45.3839	0.0691063	305.71	0.136596	53.1309	0.0825085	8.98084	3.89619	4.09804
-0.28756	0.693427	28.5005	0.0434253	216.112	0.0946836	42.3212	0.103089	5.64423	2.60532	2.2174
-0.590644	0.615408	34.1287	0.0705819	202.446	0.103372	37.8418	0.140014	5.7685	2.48176	1.23397
0.155489	0.843882	29.7498	0.0405419	203.58	0.111354	43.0884	0.0912692	6.03425	1.75268	2.30476
0.431005	0.612786	31.6938	0.0507663	246.82	0.13219	48.4186	0.11234	6.33011	2.61745	2.62151
1.16799	0.234575	34.2687	0.045382	294.93	0.105354	52.628	0.0861492	7.13907	3.99999	3.42966
-0.0481315	0.953712	29.179	0.0400657	206.231	0.127943	41.6706	0.149769	6.11701	2.04744	1.84031
1.0603	0.256425	32.1346	0.0434783	238.056	0.0805682	40.659	0.0876072	6.24828	3.40549	2.36632
1.47669	0.257442	41.7372	0.140433	325.216	0.114985	53.2054	0.101225	6.28997	4.44026	3.41773
0.340248	0.66389	27.1888	0.0534898	218.704	0.107169	43.2564	0.0911743	5.32222	2.38927	2.46388
-0.355828	0.639154	30.4939	0.0404295	217.148	0.102103	42.5458	0.0972282	6.45272	2.40001	2.22773
0.0479035	0.95084	29.3244	0.039155	207.95	0.101487	42.7318	0.0972373	6.28044	2.40908	2.32392
0.257317	0.744186	29.7437	0.0391333	201.273	0.106044	43.715	0.0834759	6.37386	2.28176	2.21014
-0.465364	0.537509	28.4627	0.036762	223.696	0.101928	42.8065	0.0955572	6.23389	2.73853	2.34234
-0.138407	0.852034	29.346	0.0383559	215.209	0.102966	42.7675	0.0990561	6.29592	2.48432	2.18247
-0.500857	0.552194	33.8357	0.0714579	232.082	0.0847476	48.5913	0.100691	6.65214	2.83677	2.73749
-2.05025	0.150015	43.6567	0.0447067	411.933	0.089077	78.4594	0.0835401	9.01844	5.73966	5.55266
-0.906454	0.351764	38.5717	0.0696782	207.878	0.105343	50.9755	0.0829295	7.18718	2.46919	3.16947
-1.01124	0.24217	32.9109	0.0486153	258.077	0.139786	51.4835	0.0804147	7.0574	2.16913	3.32066
-0.101633	0.905479	29.1525	0.0408208	205.354	0.112124	42.9968	0.0990141	5.83087	1.83616	2.35792
0.936624	0.272214	31.613	0.044009	214.428	0.0995627	40.1088	0.100283	6.99789	1.82746	2.01962
0.792836	0.384472	33.839	0.0460776	167.181	0.139001	41.3672	0.0918076	7.08077	1.49858	2.35259
0.94547	0.294501	28.7171	0.0571101	281.114	0.103114	51.8715	0.0803149	4.85903	3.33311	3.29691
1.56138	0.206751	42.1822	0.113204	298.846	0.116547	49.711	0.114104	6.22617	4.30475	2.79402
-0.700608	0.483373	33.9239	0.0564958	161.428	0.217428	40.0772	0.126004	6.76781	0.0147037	1.37421
2.25774	0.141135	50.3529	0.0759208	419.139	0.0662915	70.4215	0.0899111	7.97001	6.33858	4.62672
-2.0769	0.184388	56.6606	0.0671471	348.768	0.075844	81.6266	0.102227	9.60344	5.46469	5.19496
0.90238	0.361306	34.0107	0.0391828	235.126	0.0644541	40.5567	0.108123	7.31458	3.408	1.92294
-0.661719	0.419615	31.7285	0.0434407	186.067	0.113642	44.0639	0.0763923	6.43844	1.95077	2.80653
2.46571	0.104983	47.9894	0.0621328	372.356	0.0780552	64.1465	0.104949	8.08561	5.97446	4.11479
-2.49012	0.13896	42.6667	0.0554368	499.204	0.0522283	94.3645	0.0745357	8.90787	6.64674	6.33415
1.38749	0.211335	30.2276	0.0363579	265.299	0.0617554	37.3743	0.100746	6.67618	4.06646	2.1361
0.19455	0.804064	30.6274	0.0495361	205.602	0.0968613	42.8337	0.0964135	5.88273	2.23078	2.33386
-0.276472	0.704105	27.8005	0.0503857	206.965	0.10752	41.8865	0.103264	5.08	2.35348	2.25337
-0.483095	0.543074	31.9599	0.0441627	199.691	0.0921332	43.8753	0.0811779	6.66741	2.5155	2.71895
-0.309847	0.711762	28.0856	0.0509653	218.199	0.0942988	40.1952	0.115055	5.45087	2.55016	1.67376
-0.110851	0.903674	29.9635	0.0530295	201.593	0.14676	41.8211	0.105189	5.01891	1.09282	2.11595
-0.617534	0.569298	33.6618	0.0656841	198.151	0.110282	37.1113	0.139589	6.63924	2.30064	1.35006
0.0601412	0.943057	29.3349	0.0388479	206.3	0.117746	42.7003	0.0958525	6.18685	2.0824	2.32504
1.62141	0.244818	50.6095	0.0679761	323.513	0.160166	56.7153	0.0957361	6.89989	2.78527	3.35721
-0.760391	0.404838	31.8231	0.0371165	222.508	0.095412	38.7366	0.0909159	7.04869	2.84557	2.22573
0.0169327	0.983543	29.288	0.0392913	209.195	0.0958694	42.6681	0.107772	6.11886	2.45056	1.52188
-0.216627	0.804725	30.3938	0.0451503	194.854	0.147177	41.9948	0.100743	5.83553	1.648	2.17945
-0.0331149	0.963078	29.2501	0.0395777	209.157	0.0968873	42.3318	0.0994796	6.27804	2.306	2.19194
2.08678	0.173346	55.7646	0.0521931	256.623	0.107749	79.0187	0.0795671	9.25648	3.45458	5.16937
1.33974	0.259992	42.0623	0.0665619	261.974	0.119961	67.185	0.123119	7.94763	2.46961	3.41117
0.16487	0.82286	29.042	0.0444669	205.856	0.0948499	42.8865	0.0934303	5.20909	2.48002	2.39931
0.241194	0.776661	28.2578	0.0510113	204.86	0.099021	43.7998	0.093456	4.73597	2.43433	2.39558
2.23763	0.132527	53.7557	0.0487826	361.553	0.099448	66.7397	0.0835851	10.3591	5.15316	5.25685
-0.312818	0.732915	33.1179	0.0954059	227.861	0.102451	47.4283	0.122859	6.06412	2.23491	2.28103
-0.388936	0.606791	28.5281	0.0503709	203.336	0.0895251	43.8669	0.0843809	4.87584	2.5873	2.61285
0.445663	0.53617	29.3951	0.0460992	211.391	0.0800384	43.1268	0.0961891	5.92466	2.51958	2.17288
-0.929947	0.351342	32.7658	0.0363383	261.435	0.0673939	43.1592	0.0801297	7.25322	3.39591	2.41948
0.205687	0.779918	28.9864	0.0414457	215.45	0.100311	42.3048	0.106306	5.70355	2.46728	1.72103
-1.9453	0.169798	52.9667	0.0735048	311.193	0.0940186	75.0311	0.101187	9.20186	4.48011	5.26707
-1.34781	0.197451	31.7022	0.0355294	260.055	0.0695604	40.922	0.0709124	6.7693	4.06188	2.96597
0.342471	0.653073	30.069	0.0401364	219.893	0.0874664	42.5171	0.0966456	6.34973	2.64491	2.36394
-0.483796	0.564296	32.5047	0.0541801	224.199	0.0916302	49.7927	0.102474	6.45006	2.79883	2.69738
-0.12487	0.866264	29.7075	0.0424945	205.582	0.0989608	42.0737	0.0947638	6.20892	2.46519	2.36074
0.516503	0.509994	31.075	0.0357658	201.663	0.123473	40.2046	0.126119	6.73116	1.57312	1.1837
1.87022	0.178193	36.3471	0.0582847	441.267	0.0590443	87.6261	0.0746466	7.09447	4.98159	4.87761
0.915206	0.40767	36.771	0.0666645	318.919	0.151168	62.0896	0.135529	7.13684	3.32934	3.24754
0.448241	0.640109	31.8884	0.050838	257.937	0.156643	48.5667	0.124776	6.40431	2.61844	2.53578
0.738817	0.449963	24.8702	0.0859524	264.887	0.0809994	44.5277	0.0918278	2.39981	2.62043	2.43515
0.024611	0.973974	29.3004	0.0395161	208.242	0.108093	42.5057	0.0954898	6.23783	2.30633	2.25901
-2.20812	0.151561	57.111	0.049396	378.996	0.0990919	71.0383	0.0845216	9.89662	5.21451	4.34878
0.135082	0.853681	29.081	0.042211	208.947	0.097861	41.5562	0.106162	5.83788	2.26756	1.97241
-0.0396939	0.961424	29.245	0.0403227	211.243	0.109613	42.4016	0.0956774	6.25132	2.25614	2.34068
-0.618043	0.555217	31.2282	0.0524639	207.548	0.0913608	35.3342	0.191155	6.30458	2.61309	0.294378
-0.0650549	0.930348	29.1208	0.0409069	212.006	0.104734	42.8311	0.0963021	6.16375	2.32557	2.24749
-1.9763	0.185159	56.5669	0.0670737	328.693	0.0896499	79.7468	0.092992	9.26735	4.67376	5.38199
1.58981	0.259271	37.7793	0.0864948	313.588	0.128988	81.3201	0.138557	6.70033	3.40979	4.2276
-0.520502	0.498584	29.77	0.0389013	225.49	0.0874137	42.8196	0.0869456	6.47707	2.91778	2.59789
0.754129	0.440859	38.1316	0.0811988	216.812	0.102582	50.4366	0.0950094	6.92802	2.19382	2.95879
-1.32562	0.31407	44.4897	0.0674002	277.839	0.117848	73.829	0.120799	7.53973	2.90358	3.77439
1.61296	0.299332	50.2427	0.120601	373.412	0.114987	60.3442	0.102629	7.55153	4.00249	3.12952
-0.113921	0.882406	29.5132	0.0422127	206.845	0.0991468	43.1661	0.0968191	6.05155	2.42723	2.3567
0.541906	0.481943	29.2732	0.0454529	224.842	0.0870218	42.1172	0.0949852	5.58257	2.93916	2.41003
0.295772	0.683946	30.2128	0.0429615	214.808	0.0784138	44.1178	0.0890098	6.36937	2.5862	2.51071
-0.981974	0.441206	34.5836	0.072646	289.568	0.127896	68.7673	0.165974	6.77114	3.07579	2.39086
-0.172184	0.825498	29.2186	0.0391529	208.953	0.0943173	40.9338	0.112601	6.32545	2.49427	2.11006
2.038	0.147308	50.6572	0.0708957	301.772	0.104591	71.5456	0.121162	9.66032	2.9886	4.0193
-1.16746	0.302601	38.1748	0.0701899	289.18	0.0985883	68.4831	0.118016	6.3884	3.76894	3.75446
-0.45696	0.639951	31.6179	0.0507506	219.235	0.0840185	40.0369	0.105428	6.44524	2.69755	2.02191
-1.16113	0.24697	35.0655	0.0416073	299.103	0.111891	53.4477	0.0877331	7.3575	3.41161	3.2304
2.43897	0.105569	49.5937	0.0470521	340.866	0.120963	61.5707	0.106069	10.4207	4.30428	4.30263
-0.430994	0.615414	33.1394	0.0549649	209.594	0.117014	47.1612	0.105823	6.03099	1.70386	2.58086
-0.982645	0.275443	27.6404	0.0762055	282.001	0.090911	50.5824	0.0868917	3.24593	3.77623	3.25224
0.365325	0.678988	32.9399	0.0605705	221.413	0.101617	48.6638	0.11304	5.05136	2.5053	2.17046
-1.9298	0.165859	52.1336	0.062717	223.154	0.171787	70.8102	0.106354	9.1007	0.854081	4.43879
0.494076	0.536076	28.4657	0.0359643	232.222	0.103398	43.1394	0.0950323	6.14722	2.69004	2.24145
1.01576	0.351893	36.8903	0.0563999	329.735	0.124687	62.9446	0.115248	7.33314	3.46316	3.42284
0.271376	0.784163	31.1342	0.0568748	212.081	0.0932022	40.9282	0.107389	5.31547	2.53111	2.04373
0.645478	0.416462	28.9047	0.0417005	237.131	0.0830187	44.4227	0.0775692	6.13459	3.16083	2.85905
-0.308192	0.665022	29.7096	0.0472395	210.113	0.0862587	42.7478	0.102743	5.56914	2.47467	1.94257
-0.815874	0.471855	36.8499	0.0574065	161.639	0.181592	42.3718	0.08772	6.38407	0.950686	2.39743
0.00260387	0.997206	29.2932	0.0400404	209.323	0.0953271	42.4967	0.0998016	6.17621	2.22001	2.14643
1.11998	0.220136	33.0166	0.047324	275.535	0.109092	51.3212	0.0827532	6.30669	3.62518	3.29608
-0.816037	0.43611	37.1794	0.0767476	270.745	0.107869	60.3975	0.143853	7.04206	3.24077	3.14081
0.54235	0.589349	30.4159	0.0492588	237.017	0.0836543	40.2835	0.0967285	6.14377	2.54428	2.18691
-1.93903	0.172639	47.9061	0.102214	385.561	0.085838	70.4563	0.0804045	7.9477	5.55948	5.30367
-0.603812	0.531252	31.3519	0.0504919	280.116	0.126501	51.9863	0.101436	6.29304	1.9904	2.49131
-0.41621	0.638296	30.4513	0.0441939	222.886	0.0962597	40.7616	0.0940358	6.51733	2.58466	2.28951
0.0688973	0.922872	29.1357	0.0405894	208.492	0.0996215	42.0941	0.101395	6.19833	2.1833	2.16569
-0.606419	0.490503	28.9136	0.039079	249.119	0.072127	43.4398	0.0825373	6.37288	2.637	2.71741
-0.780227	0.474677	37.8953	0.0802441	265.423	0.129404	60.3541	0.160583	6.80726	2.85735	2.97569
-1.14291	0.291822	35.6684	0.0511924	331.891	0.0907745	57.1474	0.0835688	6.83085	3.857	3.31224
0.0669986	0.927833	29.2784	0.0395256	209.575	0.0945618	42.1106	0.0998664	6.25274	2.43778	2.35319
-0.324483	0.687567	29.5026	0.0426943	234.004	0.0971168	45.0286	0.0841474	5.96505	1.88849	2.30714
-0.148195	0.871877	30.0778	0.0486477	199.154	0.148922	42.4873	0.0937096	5.90404	1.6036	2.36505
1.78757	0.187087	53.5109	0.0963812	226.348	0.128095	58.5022	0.0999567	8.94645	1.46923	3.25061
-0.0695572	0.945931	28.8403	0.0625347	215.268	0.161977	43.0755	0.107916	5.44274	0.45051	1.66547
0.5792	0.520111	31.3202	0.0447217	211.191	0.0959475	38.4424	0.116053	6.75094	2.16277	1.63657
0.621188	0.441058	27.4525	0.0354446	237.977	0.100102	44.8249	0.0748572	6.21173	2.78207	2.8185
1.80487	0.207086	52.7485	0.0679182	274.294	0.0917267	75.9117	0.0917357	8.82083	4.091	4.90896
-0.383697	0.601376	30.3594	0.0378639	216.383	0.0753764	44.3545	0.0832558	6.53624	2.68654	2.62485
-0.763364	0.470589	39.2956	0.0922486	216.176	0.100503	51.4768	0.0999383	6.8615	2.62362	2.8168
-1.07304	0.298726	37.2019	0.0461395	299.826	0.138671	64.0456	0.100054	7.66541	3.64118	3.77506
0.920342	0.297805	33.6484	0.0331106	226.653	0.0972021	43.0918	0.0682478	7.55893	2.89476	3.12719
0.967956	0.410795	38.2888	0.0839525	292.318	0.117519	66.065	0.161919	6.79303	3.34103	3.1567
-1.21699	0.285518	36.9798	0.0524913	363.89	0.0977813	69.0723	0.098631	7.64368	3.85391	3.76968
-0.858309	0.333047	31.9331	0.0520773	221.001	0.0835847	39.6083	0.113385	6.28739	2.51157	1.72588
0.0535173	0.943097	29.1237	0.0434379	206.548	0.11386	42.288	0.0964414	5.72034	1.88101	2.35595
0.171755	0.857151	28.4158	0.0535838	214.188	0.0920889	44.4177	0.106834	5.54613	2.13102	1.40722
0.170912	0.837561	29.9038	0.0467985	215.021	0.0996046	45.2835	0.126627	6.09068	2.38286	1.99393
-1.03401	0.332323	37.8274	0.0454199	316.725	0.130121	62.0916	0.115168	7.426	3.68628	3.55058
0.208591	0.779027	30.1888	0.041558	213.907	0.0947093	42.8897	0.0927099	6.2805	2.52969	2.43163
1.8627	0.176496	42.1018	0.0619562	387.001	0.0930267	78.9525	0.108893	7.30558	5.3473	4.83356
-0.219401	0.760234	28.4923	0.0405746	207.849	0.105067	42.4676	0.0946136	6.20966	2.34485	2.41501
1.09022	0.331162	36.2923	0.0703183	341.765	0.126947	66.214	0.130358	6.16831	3.64255	3.51296
0.282117	0.721067	30.9578	0.0527186	222.693	0.0986193	46.7465	0.113647	6.3351	2.52394	2.36598
-0.234399	0.841995	30.7613	0.0601444	186.777	0.258568	40.2601	0.13698	4.38309	-0.424817	1.61576
0.883196	0.356506	30.0851	0.0453777	300.653	0.0917128	54.7883	0.0758208	6.37268	3.24614	3.30054
0.441936	0.665247	33.072	0.0733252	249.933	0.136796	53.5193	0.17781	6.2218	2.48789	2.0665
0.220097	0.797737	29.269	0.0353107	228.651	0.128825	44.2081	0.0959221	6.21747	2.13081	2.34945
0.305239	0.725822	30.5162	0.0439623	186.602	0.153092	40.0647	0.106653	6.21804	1.70389	2.28365
0.094125	0.905758	29.1495	0.0413996	212.712	0.101377	42.1166	0.0979594	6.00837	2.45154	2.2572
0.800608	0.464384	37.8786	0.0782358	275.132	0.111058	61.3123	0.150019	6.92498	3.08807	3.03271
-0.357891	0.649594	29.1117	0.037767	228.912	0.101572	43.636	0.095678	6.00751	2.5993	2.32877
-1.79876	0.162714	43.3371	0.0542873	246.906	0.124096	75.5159	0.0745527	8.80633	3.00278	5.21359
-1.21902	0.218349	33.559	0.0436011	133.489	0.201913	43.1065	0.060551	7.43773	0.272287	3.30611
0.536805	0.484732	30.5209	0.0334186	220.804	0.0960621	42.6922	0.0820223	6.71995	2.7817	2.74539
0.527817	0.483284	30.3893	0.0388428	190.115	0.105321	41.1375	0.10249	6.65317	2.12015	2.26855
0.437528	0.643031	30.2422	0.0484655	227.436	0.0902605	40.4792	0.103663	6.18303	2.6276	2.06708
-0.128054	0.863776	29.5354	0.0403549	205.225	0.10805	41.5903	0.104901	6.28652	2.23522	2.17684
-0.590691	0.482007	33.3834	0.0422057	215.254	0.0986551	49.4599	0.0841587	6.62716	2.6372	2.84275
-1.11773	0.29234	42.711	0.0841502	250.383	0.0800361	53.9189	0.0866947	7.73582	3.49538	3.6047
-1.09789	0.345074	37.0602	0.0705016	271.405	0.107183	68.1169	0.124821	6.92317	3.47286	3.4795
-1.1471	0.257598	35.45	0.0427768	303.014	0.106962	54.4448	0.0818723	7.02377	3.98845	3.51006
1.69115	0.226786	46.4712	0.0990228	354.691	0.108834	55.3818	0.118766	8.13199	4.02396	2.5709
-0.125677	0.870806	28.4934	0.0532721	212.176	0.100045	42.668	0.0959271	5.28411	2.41852	2.37265
-1.22985	0.245307	34.2671	0.0509965	340.177	0.0702175	58.3156	0.0736316	6.76688	4.00013	3.59222
-0.372246	0.619582	30.8392	0.0416973	203.627	0.0878316	42.5848	0.0994552	6.53121	2.57176	2.17359
-2.00813	0.184881	59.9402	0.0558956	335.071	0.0900545	80.0329	0.0970762	7.73607	3.66796	4.90022
-1.4327	0.267042	45.0527	0.0590477	257.948	0.13479	70.344	0.118319	8.1395	1.99438	3.57349
-2.21342	0.179022	37.0485	0.0881023	338.017	0.117789	95.9978	0.108016	6.47844	3.58003	4.98938
0.965586	0.256818	32.5543	0.035175	208.666	0.139629	40.3128	0.0909636	7.41433	1.186	2.29357
-0.0490501	0.94513	29.3464	0.040098	209.49	0.0921661	42.3979	0.0942865	6.26155	2.24062	2.34666
1.56815	0.251058	44.312	0.118527	333.194	0.12784	52.6965	0.133458	7.73975	3.57132	2.03969
-1.04866	0.308605	37.4343	0.0616447	272.253	0.103484	62.4859	0.12066	7.56503	3.0334	3.53951
-0.230219	0.748435	28.8317	0.0414424	210.984	0.102791	41.654	0.111401	5.94431	2.18099	1.76036
-0.487498	0.522776	30.9491	0.0357133	194.674	0.0992906	42.7476	0.0846498	6.67689	2.22248	2.6864
-0.436051	0.543807	28.6832	0.0353546	198.179	0.140103	41.039	0.115288	6.4101	1.07154	1.65836
-0.414262	0.630074	33.6269	0.0779681	224.052	0.0947586	47.8175	0.105211	6.5225	2.70369	2.56828
-0.61616	0.431012	30.7414	0.0446587	240.905	0.118699	47.279	0.0939301	6.47283	2.94513	2.89172
-0.100058	0.90203	29.3005	0.0381956	205.177	0.113054	42.877	0.0961422	6.26484	1.73543	2.36475
0.134757	0.858763	28.627	0.0477698	212.926	0.0996375	42.2039	0.094389	5.87053	2.47503	2.30441
0.578371	0.553011	31.3369	0.053462	277.23	0.138688	51.1828	0.115642	6.1067	2.58247	2.72766
-0.264778	0.818229	30.7687	0.0564204	183.209	0.266213	39.7027	0.146582	5.78916	-0.458529	1.44237
-0.0569341	0.941432	29.0034	0.0480089	209.774	0.0967282	42.0186	0.110687	5.39961	2.37319	1.39802
0.148778	0.836098	28.8639	0.039534	210.976	0.100925	42.8052	0.0948979	6.31823	2.33643	2.38888
-1.81819	0.200895	55.9475	0.0955876	244.163	0.0863623	61.8252	0.0862158	8.2144	3.4437	3.36159
-2.01958	0.145365	56.7858	0.0562204	197.884	0.195436	57.4516	0.0952119	9.05828	0.102475	3.33884
-0.172974	0.834093	30.296	0.0496075	213.376	0.102917	45.1721	0.123455	6.24911	2.35727	2.21215
-1.1649	0.238149	32.0045	0.039491	215.207	0.0749237	35.0631	0.136545	7.04406	2.96391	1.33971
-0.335176	0.639474	29.3609	0.0352928	209.286	0.105851	41.9499	0.105037	6.40608	2.42879	2.03497
0.474378	0.571234	32.0902	0.0482615	191.131	0.127405	43.289	0.0959495	6.61245	1.26241	2.24072
-0.416909	0.580254	30.6472	0.0363651	221.323	0.0941065	43.7855	0.0820883	6.59902	2.75134	2.66468
0.576061	0.496227	28.8314	0.0417082	239.465	0.0817979	42.1526	0.0904372	5.9906	2.93358	2.50402
1.70591	0.192263	43.8012	0.058504	263.007	0.10978	73.7527	0.0949648	8.0211	3.47169	4.76283
0.0835346	0.905842	29.2986	0.0405314	209.042	0.0906382	42.267	0.0939043	6.25652	2.37178	2.36218
-1.81578	0.169481	35.1593	0.0706266	433.961	0.0605088	83.4184	0.0779863	5.28989	4.86327	4.93724
-1.80203	0.21797	55.8321	0.0587935	276.976	0.0989496	76.3099	0.0953558	8.24914	3.01608	4.47018
-2.16158	0.147181	55.3728	0.0509792	351.593	0.125922	68.3624	0.0974639	9.76275	4.49706	3.71444
2.39589	0.136021	56.0925	0.045056	449.283	0.0531939	75.4835	0.063973	10.0554	6.23018	5.70538
-1.07371	0.34668	42.8482	0.0818414	283.685	0.0858015	64.5911	0.120891	7.46814	3.66616	3.54628
0.860336	0.445152	37.1939	0.0575483	306.753	0.128624	54.504	0.108657	6.70613	3.04357	2.98798
0.454014	0.551142	27.8862	0.0445387	224.487	0.102941	42.6732	0.102028	5.63062	2.52374	1.9709
0.392983	0.606381	30.2153	0.0422049	221.78	0.0990477	42.8242	0.10182	6.16327	2.55993	1.91434
-1.70494	0.235351	52.8659	0.0806681	270.842	0.10255	76.0133	0.100626	7.82637	3.63423	4.18413
-0.148304	0.848103	29.1313	0.0410078	211.832	0.0935574	41.5542	0.104625	6.17333	2.48774	2.12136
-1.34355	0.191238	29.0837	0.0458052	268.186	0.0546281	40.1373	0.071398	5.54079	4.28549	2.97962
1.07731	0.333124	42.1984	0.079553	278.752	0.0921159	64.1774	0.11636	7.54864	3.42314	3.61711
-0.596564	0.507045	30.3931	0.0543116	212.265	0.0919197	37.247	0.140942	5.88817	2.33979	1.03306
0.536378	0.5198	33.1748	0.0479317	221.702	0.0993903	49.5259	0.0966828	6.70068	2.41707	2.77404
-1.72067	0.204212	43.063	0.106372	355.687	0.0749715	56.0568	0.0659552	7.74586	4.76473	4.10632
0.505204	0.534318	33.1986	0.0690627	229.879	0.0864459	48.3491	0.10067	6.43905	2.77703	2.70489
-0.871686	0.383629	39.1618	0.0704711	203.261	0.12995	49.7188	0.0983697	7.15069	1.30077	2.69221
0.741755	0.445382	29.8686	0.0449976	234.065	0.0864354	37.5181	0.118987	6.51705	2.79783	1.54351
0.616513	0.453629	29.8463	0.0574875	232.964	0.0800566	50.567	0.0887273	4.68057	3.03045	2.95233
-0.281279	0.741935	31.3711	0.0532346	227.502	0.105165	48.0322	0.12632	6.02779	2.28042	1.82816
-0.351549	0.64942	27.0674	0.0550073	213.376	0.104343	40.3223	0.102793	5.17911	2.27135	2.14506
-1.32255	0.299686	43.2716	0.0727333	272.075	0.112514	72.3149	0.118937	7.66835	3.50761	3.8661
-1.85743	0.209446	60.2817	0.083924	254.407	0.0831628	65.2761	0.0756468	7.68676	3.74385	4.42822
0.601382	0.523548	31.6817	0.0435855	208.395	0.101658	37.3891	0.129949	6.68892	1.9897	1.43298
-0.434826	0.556212	30.4807	0.0411264	204.586	0.0808989	43.5256	0.086699	6.4509	2.69047	2.63707
0.127618	0.901076	30.0896	0.0578875	198.401	0.184186	41.5963	0.108371	4.72962	1.39694	2.32579
