# Supplementary material for: Colour pattern predicts outcome of female contest competition in a sexually monomorphic fish
Source: Biol Lett. 2018 Nov 7;14(11):20180480. doi: 10.1098/rsbl.2018.0480 (PMC6283925; doi:10.1098/rsbl.2018.0480)
Supplement: Supplementary data 3 [file rsbl20180480supp4.xlsx]

## Sheet: bar.width.over.time
fish	days	MBW	SL
m01	0	3.606	9.437
m01	166	3.591	9.378
m01	645	3.828	10.012
f10	0	2.804	8.696
f10	413	2.775	8.762
m11	0	2.741	8.019
m11	386	2.732	8.31
m12	0	3.396	10
m12	133	3.309	9.394
m12	782	3.448	10.05
f13	0	2.571	8.873
f13	421	2.686	8.914
m14	0	3.069	8.792
m14	59	3.116	9.24
m14	386	3.289	9.57
f15	0	2.851	8.144
f15	413	2.914	8.72
m16	0	3.384	9.66
m16	469	3.262	9.765
f17	0	3.279	8.985
f17	458	3.148	9.016
f18	0	3.181	9.031
f18	421	3.382	9.275
m19	0	2.683	7.86
m19	386	2.71	8.319
m02	0	3.592	9.536
m02	68	3.62	9.892
m02	371	3.498	9.786
m20	0	2.892	8.985
m20	386	2.976	9.387
f21	0	3.222	9.308
f21	435	3.383	9.748
f22	0	3.117	9.321
f22	435	3.231	9.497
m23	0	3.047	8.899
m23	386	3.244	9.288
f24	0	3.597	8.89
f24	132	3.685	9.166
f24	331	3.721	9.313
f24	633	4.182	9.5
f25	0	3.249	9.126
f25	435	3.292	8.904
m26	0	2.824	8.714
m26	566	3.181	9.714
m27	0	3.069	9.621
m27	142	3.096	9.638
m27	469	2.962	9.66
m28	0	2.937	9.349
m28	469	2.849	9.488
f29	0	2.649	8.7
f29	170	2.701	8.714
m03	0	3.609	9.549
m03	394	3.738	9.648
m30	0	3.27	9.398
m30	469	3.428	9.953
f31	0	3.915	9.495
f31	139	4.189	9.797
f31	435	4.105	9.698
m32	0	3.419	9.144
m32	649	3.727	9.622
m33	0	3.095	9.874
m33	98	3.12	9.846
m33	469	3.426	10.411
f34	0	2.893	8.984
f34	170	2.814	8.942
f35	0	3.252	8.468
f35	26	3.07	8.453
f35	167	3.149	8.601
f35	484	3.108	8.643
f36	0	2.78	8.751
f36	413	2.683	8.902
m37	0	2.943	7.124
m37	83	3.124	7.456
m38	0	2.665	7.887
m38	84	2.731	8.062
m39	0	2.632	8.873
m39	84	2.637	8.553
f04	0	3.534	9.038
f04	435	3.663	9.193
m40	0	3.084	8.382
m40	100	3.14	8.467
m40	386	3.22	8.817
f41	0	3.452	8.958
f41	331	3.389	8.977
f42	0	3.102	8.435
f42	413	3.158	8.752
f43	0	3.121	8.534
f43	412	3.073	8.841
m44	0	3.175	9.77
m44	470	3.496	9.716
f45	0	3.256	8.306
f45	401	3.227	8.478
m05	0	3.651	9.758
m05	469	3.522	9.635
m06	0	3.636	10.273
m06	167	3.636	10.295
m06	470	3.546	10.223
m07	0	3.122	9.485
m07	386	3.251	9.823
m09	0	3.227	9.708
m09	84	3.233	9.276
m09	470	2.928	9.612
